# Supplementary material
Source: Elsevier journal article supplement (https://www.sciencedirect.com/science/article/pii/S1885585723000804)
Supplement: mmc1 [file mmc1.pdf]

## **SUPPLEMENTARY DATA**

### **SECTION A. STUDY CONTEXT**

This study was conducted in Catalonia, which is located in the northeast region of Spain. As in most European regions, in Catalonia, residents (N = 7 816 419 as of 2019) are granted universal public health care coverage by law.

In Catalonia, health care is delivered by the Catalan Health Service (CatSalut). The Catalan territory is divided into 7 health regions, delimited on the basis of geographical, socioeconomic, and demographic factors. These regions have adequate endowment of health resources for primary and specialized care including hospital care to meet the needs of the population. Each region is divided into health sectors, and these sectors are in turn, composed of integrated health care areas where coordination of care between hospital and primary care is guaranteed by contract.

In the recent years, specialized disease management programs, improved transitional care, and enhanced long-term care, among other interventions, have been delivered in Catalonia by the Catalan Health Service to promote quality of care improvement in the care of patients with chronic conditions, particularly chronic heart failure (HF).<sup>1-6</sup>

### **SECTION B. COMPONENTS AND IMPLEMENTATION OF THE NEW PRIMARY CARE-HOSPITAL INTEGRATED HEART FAILURE PROGRAM**

Since 2017, a new program to improve the quality of care of patients with chronic HF has been developed and implemented in the Bellvitge University Hospital (HUB)-Delta del Llobregat Primary Care Service (HUB-DELTA) integrated health care area, located in the South Metropolitan Sector of the Barcelona Health Region. The HUB-DELTA integrated health care area provides multilevel and

multiprovider health care coordination for a population of 209 255 inhabitants (2019) in the city of El Prat de Llobregat and 2 urban districts of the city of L'Hospitalet de Llobregat (south and center L'Hospitalet de Llobregat). The health care network for patients with HF constructed in the HUB-DELTA area integrates health care institutions belonging to the Catalan Health Institute that include the HUB and 10 primary care centers of the Delta Primary Care Service along with other providers (social and health care, rehabilitation services, social services).

The HUB-DELTA HF program was designed as a nurse-based multidisciplinary, transitional care HF program. Details of the model implemented have been previously published.<sup>1</sup> In its design, an attempt was made to develop the conceptual framework provided by the Chronic Care Model including all components of care and interventions that have shown benefits in the care of patients with HF.<sup>1,7-11</sup> In brief, these include: *a)* encouraging patient empowerment through promotion of self-management and self-efficacy, *b)* promoting proactive planned structured care interventions instead of reactive care, *c)* interventions based on advanced practice nurses in both hospital and primary care, *d)* a multidisciplinary team approach, *e)* promotion of flexible health care services providing open access to patients when needed, *f)* prioritization of eHealth-based care (telemedicine), *g)* implementation of the use of electronic tools and strategies to support decision-making to specialized nurses, community nurses, and family physicians, *h)* enabling the use of shared electronic medical records and information systems to, first, improve communication and coordination of care among health care professionals and, second, to provide information to clinicians and managers on outcomes using dedicated key performance indicators (KPI) obtained from the information systems.

This model was successfully implemented previously in a different health care area.<sup>2</sup> In the current implementation, the model has been updated and improved in several aspects including: *a)* a more refined universal detection of patients in the acute phase, *b)* enhanced discharge coordination, *c)* improved early postdischarge contact, *d)* extension of structured follow up pathways of patients in all care settings including hospital-based HF clinic, primary care offices and home-based care, *e)* shared

electronic care plans between hospital and primary care, *f*) motivational interviewing-based nurse interventions and *g*) robust KPI monitoring of the implementation.

### **SECTION C. DATA SOURCES AND DATA QUALITY CONTROL**

Since 2011, the Health Department of the Government of Catalonia has used an automated administrative health care database (the Catalan Health Surveillance System [CHSS]), which periodically collects detailed individual-level information on demographics and socioeconomic characteristics, as well as exhaustive health-related and medical resource use information generated by the interactions between Catalan residents and the public health care system. This longitudinal, quality-controlled, updated information system allows the performance of epidemiological analyses, evaluations of health care interventions and programs, and public analysis and benchmarking of health indicators across health care areas, among other assessments. Further details on the characteristics of the CHSS data base have been reported elsewhere by our group.<sup>12-17</sup>

Specifically for health care-related data, the database integrates information from a number of sources including the Minimum Data Set for Healthcare Units registry (which includes hospitalizations and use of primary care, emergency department, outpatient hospital clinics, mental health services, and skilled nursing facility services), information on pharmacy prescription, dialysis, ambulatory rehabilitation, home-based respiratory therapies, nonurgent health transport and billing records among other information. Medical conditions are coded using the International Classification of Diseases, 9th Revision, Clinical Modification (ICD-9-CM) coding system. The vital status of the citizens included in the database is updated using information from the National Statistics Institute, Spanish Statistical Office. These registries have an automatic data validation system. Moreover, an external audit is carried out periodically to ensure data quality.

#### **SECTION D. STUDY DESIGN, STUDY POPULATION, CODING CRITERIA AND OBJECTIVES**

To evaluate the influence of socioeconomic status (SES) on the effectiveness of a multilevel, multidisciplinary, transitional care program for the management of patients with HF, we followed 3 critical steps.

In the first step, we designed and implemented a comprehensive HF program in the HUB-DELTA integrated health care area between November 2016 and December 2019. In terms of the quality of interventions implemented in the HUB-DELTA HF program, we included 3 distinct implementation periods: preimplementation period (2015 and 2016), transition period (2017) and consolidation of implementation period (2018 and 2019).

As a second step, we designed a pragmatic, population-based evaluation of the implementation of the program by conducting a natural experiment. For the purposes of this study, we included all individuals consecutively admitted to hospital with at least one ICD-9-CM code for HF as the primary diagnosis and discharged alive in Catalonia between January 1, 2015 and December 31, 2019. ICD-9-CM codes used for hospital admission due to HF were: 398.91, 402.x1, 404.x1, 404.x3, 428.0, 428.1, 428.2x, 428.x3, and 428.x4. SES, general clinical characteristics, demographic information, information on comorbidities and previous medical resource use were obtained at baseline in all patients. Clinical outcomes were measured and analyzed for all patients between January 1, 2015 and December 31, 2019. For the index admission at each time period or year of analysis and successive clinically-related and HF readmissions, we included only unplanned acute admissions lasting more than 24 hours.

The effectiveness of the implementation of the program was measured at 2 levels: first, comparing the outcomes of patients exposed to the HUB-DELTA HF program between periods of implementation taking 2015 (preimplementation) as the reference year and the period 2015 to 2016

(preimplementation period) as the reference period (intragroup comparison) and, second, comparing outcomes between patients in the HUB-DELTA area with patients in the remaining areas of the Catalan Health Service (CatSalut) at each predefined implementation period (between groups comparison).

The third step in the current project involved evaluation of the efficacy of the HUB-DELTA HF program stratified according to the level of SES across the studied time periods.

The primary outcome variable of the study was the time until the first clinically-related readmission. Secondary outcome variables were time until the first admission for HF and time to death. The outcomes variables were evaluated globally for the evaluation of the newly implemented HF program and stratified according to SES for the evaluation of the influence of SES on the effectiveness of a comprehensive HF program. The complete coding criteria for the present study is presented below.

#### **List of ICD-9-CM codes used to define each of the conditions evaluated in the study**

##### **Previous myocardial infarction**

| <b>Code</b> | <b>Description</b>          |
|-------------|-----------------------------|
| 410.xx      | Acute myocardial infarction |
| 412         | Old myocardial infarction   |

##### **Atrial fibrillation**

| <b>Code</b> | <b>Description</b>  |
|-------------|---------------------|
| 427.31      | Atrial fibrillation |

##### **Peripheral vascular disease**

| <b>Code</b> | <b>Description</b>                             |
|-------------|------------------------------------------------|
| 093.0       | Aneurysm of aorta specified as syphilitic      |
| 437.3       | Cerebral aneurysm nonruptured                  |
| 440.x       | Atherosclerosis                                |
| 441.x       | Aortic aneurysm and dissection                 |
| 443.1       | Thromboangiitis obliterans (buerger's disease) |
| 443.2x      | Other peripheral vascular disease              |
| 443.8x      | Other specified peripheral vascular diseases   |
| 443.9       | Peripheral vascular disease unspecified        |

|       |                                                 |
|-------|-------------------------------------------------|
| 447.1 | Stricture of artery                             |
| 557.1 | Chronic vascular insufficiency of intestine     |
| 557.9 | Unspecified vascular insufficiency of intestine |
| V43.4 | Blood vessel replaced by other means            |

### Hypertension

| Code   | Description                          |
|--------|--------------------------------------|
| 401.xx | Essential hypertension               |
| 402.xx | Hypertensive heart disease           |
| 403.xx | Hypertensive renal disease           |
| 404.xx | Hypertensive heart and renal disease |
| 405.xx | Secondary hypertension               |

### Obesity

| Code   | Description                          |
|--------|--------------------------------------|
| 278.00 | Obesity, unspecified                 |
| 278.01 | Morbid obesity                       |
| V85.3x | Body Mass Index between 30-39, adult |
| V85.4x | Body Mass Index 40 and over, adult   |

### Smoking

| Code   | Description                                                                |
|--------|----------------------------------------------------------------------------|
| 305.1  | Tobacco use disorder                                                       |
| 649.0x | Tobacco use disorder complicating pregnancy, childbirth, or the puerperium |
| 989.84 | Toxic effect of other substances: Tobacco                                  |
| V15.82 | History of tobacco use                                                     |

### Hyperlipidemia

| Code   | Description                          |
|--------|--------------------------------------|
| 272.0x | Pure hypercholesterolemia            |
| 272.1x | Pure hyperglyceridemia               |
| 272.2x | Hyperlipidemia, mixed                |
| 272.3x | Hyperchylomicronemia                 |
| 272.4x | Other and unspecified hyperlipidemia |

## Diabetes mellitus

| Code   | Description       |
|--------|-------------------|
| 250.xx | Diabetes mellitus |

## Chronic kidney disease

| Code   | Description                                                                                                                                          |
|--------|------------------------------------------------------------------------------------------------------------------------------------------------------|
| 403.01 | Hypertensive chronic kidney disease, malignant, with chronic kidney disease stage v or end stage renal disease                                       |
| 403.11 | Hypertensive chronic kidney disease, benign, with chronic kidney disease stage v or end stage renal disease                                          |
| 403.91 | Hypertensive chronic kidney disease, unspecified, with chronic kidney disease stage v or end stage renal disease                                     |
| 404.02 | Hypertensive heart and chronic kidney disease, malignant, without heart failure and with chronic kidney disease stage v or end stage renal disease   |
| 404.03 | Hypertensive heart and chronic kidney disease, malignant, with heart failure and with chronic kidney disease stage v or end stage renal disease      |
| 404.12 | Hypertensive heart and chronic kidney disease, benign, without heart failure and with chronic kidney disease stage v or end stage renal disease      |
| 404.13 | Hypertensive heart and chronic kidney disease, benign, with heart failure and chronic kidney disease stage v or end stage renal disease              |
| 404.92 | Hypertensive heart and chronic kidney disease, unspecified, without heart failure and with chronic kidney disease stage v or end stage renal disease |
| 404.93 | Hypertensive heart and chronic kidney disease, unspecified, with heart failure and chronic kidney disease stage v or end stage renal disease         |
| 582.x  | Chronic glomerulonephritis                                                                                                                           |
| 583.0x | Nephritis and nephropathy not specified as acute or chronic with lesion of proliferative glomerulonephritis                                          |
| 583.1x | Nephritis and nephropathy not specified as acute or chronic with lesion of membranous glomerulonephritis                                             |
| 583.2x | Nephritis and nephropathy not specified as acute or chronic with lesion of membranoproliferative glomerulonephritis                                  |
| 583.4x | Nephritis and nephropathy not specified as acute or chronic with lesion of rapidly progressive glomerulonephritis                                    |
| 583.6x | Nephritis and nephropathy not specified as acute or chronic with lesion of renal cortical necrosis                                                   |
| 583.7x | Nephritis and nephropathy not specified as acute or chronic with lesion of renal medullary necrosis                                                  |
| 585.x  | Chronic renal failure                                                                                                                                |
| 586.x  | Renal failure unspecified                                                                                                                            |
| 588.0  | Renal osteodystrophy                                                                                                                                 |
| V42.0  | Kidney replaced by transplant                                                                                                                        |
| V45.1x | Postsurgical renal dialysis status                                                                                                                   |
| V56.x  | Encounter for dialysis and dialysis catheter care                                                                                                    |

## Anemia

| Code  | Description                   |
|-------|-------------------------------|
| 280.x | Iron deficiency anemias       |
| 281.x | Other deficiency anemias      |
| 282.x | Hereditary hemolytic anemias  |
| 283.x | Acquired hemolytic anemias    |
| 284.x | Aplastic anemia               |
| 285.x | Other and unspecified anemias |

## COPD (Chronic obstructive pulmonary disease)

| Code   | Description                                          |
|--------|------------------------------------------------------|
| 491.0  | Chronic bronchitis                                   |
| 491.2x | Obstructive chronic bronchitis                       |
| 491.8  | Other chronic bronchitis                             |
| 491.9  | Unspecified chronic bronchitis                       |
| 492.x  | Emphysema                                            |
| 494.x  | Bronchiectasis                                       |
| 496    | Chronic airway obstruction, not elsewhere classified |

## Cancer

| Code  | Description                                                                              |
|-------|------------------------------------------------------------------------------------------|
| 140.x | Malignant neoplasm of lip                                                                |
| 141.x | Malignant neoplasm of tongue                                                             |
| 142.x | Malignant neoplasm of major salivary glands                                              |
| 143.x | Malignant neoplasm of gum                                                                |
| 144.x | Malignant neoplasm of floor of mouth                                                     |
| 145.x | Malignant neoplasm of other and unspecified parts of mouth                               |
| 146.x | Malignant neoplasm of oropharynx                                                         |
| 147.x | Malignant neoplasm of nasopharynx                                                        |
| 148.x | Malignant neoplasm of hypopharynx                                                        |
| 149.x | Malignant neoplasm of other and ill-defined sites within the lip oral cavity and pharynx |
| 150.x | Malignant neoplasm of esophagus                                                          |
| 151.x | Malignant neoplasm of stomach                                                            |
| 152.x | Malignant neoplasm of small intestine including duodenum                                 |
| 153.x | Malignant neoplasm of colon                                                              |
| 154.x | Malignant neoplasm of rectum rectosigmoid junction and anus                              |



|       |                                                                                                          |
|-------|----------------------------------------------------------------------------------------------------------|
| 155.x | Malignant neoplasm of liver and intrahepatic bile ducts                                                  |
| 156.x | Malignant neoplasm of gallbladder and extrahepatic bile ducts                                            |
| 157.x | Malignant neoplasm of pancreas                                                                           |
| 158.x | Malignant neoplasm of retroperitoneum and peritoneum                                                     |
| 159.x | Malignant neoplasm of other and ill-defined sites within the digestive organs and peritoneum             |
| 160.x | Malignant neoplasm of nasal cavities middle ear and accessory sinuses                                    |
| 161.x | Malignant neoplasm of larynx                                                                             |
| 162.x | Malignant neoplasm of trachea bronchus and lung                                                          |
| 163.x | Malignant neoplasm of pleura                                                                             |
| 164.x | Malignant neoplasm of thymus heart and mediastinum                                                       |
| 165.x | Malignant neoplasm of other and ill-defined sites within the respiratory system and intrathoracic organs |
| 170.x | Malignant neoplasm of bone and articular cartilage                                                       |
| 171.x | Malignant neoplasm of connective and other soft tissue                                                   |
| 172.x | Malignant melanoma of skin                                                                               |
| 173.x | Other malignant neoplasms of skin                                                                        |
| 174.x | Malignant neoplasm of female breast                                                                      |
| 175.x | Malignant neoplasm of female breast                                                                      |
| 176.x | Kaposi sarcoma                                                                                           |
| 179.x | Malignant neoplasm of uterus-part unspecified                                                            |
| 180.x | Malignant neoplasm of cervix uteri                                                                       |
| 181.x | Malignant neoplasm of placenta                                                                           |
| 182.x | Malignant neoplasm of body of uterus                                                                     |
| 183.x | Malignant neoplasm of ovary and other uterine adnexa                                                     |
| 184.x | Malignant neoplasm of other and unspecified female genital organs.                                       |
| 185.x | Malignant neoplasm of prostate                                                                           |
| 186.x | Malignant neoplasm of testis                                                                             |
| 187.x | Malignant neoplasm of penis and other male genital organs                                                |
| 188.x | Malignant neoplasm of bladder                                                                            |
| 189.x | Malignant neoplasm of kidney and other and unspecified urinary organs                                    |
| 190.x | Malignant neoplasm of eye                                                                                |
| 191.x | Malignant neoplasm of brain                                                                              |
| 192.x | Malignant neoplasm of other and unspecified parts of nervous system                                      |
| 193.x | Malignant neoplasm of thyroid gland                                                                      |
| 194.x | Malignant neoplasm of other endocrine glands and related structures                                      |
| 195.x | Malignant neoplasm of other and ill-defined sites                                                        |
| 196.x | Secondary and unspecified malignant neoplasm of lymph nodes                                              |
| 197.x | Secondary malignant neoplasm of respiratory and digestive systems                                        |
| 198.x | Secondary malignant neoplasm of other specified sites                                                    |
| 199.x | Malignant neoplasm without specification of site                                                         |
| 200.x | Lymphosarcoma and reticulosarcoma                                                                        |

|        |                                                                       |
|--------|-----------------------------------------------------------------------|
| 201.x  | Hodgkin's disease                                                     |
| 202.x  | Other malignant neoplasms of lymphoid and histiocytic tissue          |
| 203.x  | Multiple myeloma and immunoproliferative neoplasms                    |
| 204.x  | Lymphoid leukemia                                                     |
| 205.x  | Myeloid leukemia                                                      |
| 206.x  | Monocytic leukemia                                                    |
| 207.x  | Other specified leukemias                                             |
| 208.x  | Leukemia of unspecified cell type                                     |
| 209.1x | Malignant carcinoid tumors of the appendix large intestine and rectum |
| 209.2x | Malignant carcinoid tumor of unknown primary site                     |
| 209.3x | Malignant poorly differentiated neuroendocrine carcinoma any site     |
| 209.7x | Secondary neuroendocrine tumors                                       |
| 230.x  | Carcinoma in situ of digestive organs                                 |
| 231.x  | Carcinoma in situ of respiratory system                               |
| 232.x  | Carcinoma in situ of skin                                             |
| 233.x  | Carcinoma in situ of breast and genitourinary system                  |
| 234.x  | Carcinoma in situ of other and unspecified sites                      |

#### **Osteoarthritis**

| <b>Code</b> | <b>Description</b>                                               |
|-------------|------------------------------------------------------------------|
| 712.x       | Crystal arthropathies                                            |
| 713.x       | Arthropathy associated with other disorders classified elsewhere |
| 714.x       | Rheumatoid arthritis and other inflammatory polyarthropathies    |
| 716.x       | Other and unspecified arthropathies                              |
| 720.0x      | Ankylosing spondylitis                                           |
| 730.x       | Osteomyelitis periostitis and other infections involving bone    |

#### **Cognitive impairment**

| <b>Code</b> | <b>Description</b>                    |
|-------------|---------------------------------------|
| 317         | Mild intellectual disabilities        |
| 318.x       | Other specified mental retardation    |
| 319         | Unspecified intellectual disabilities |

#### **Cirrhosis**

| <b>Code</b> | <b>Description</b>                 |
|-------------|------------------------------------|
| 571.2       | Alcoholic cirrhosis of liver       |
| 571.5       | Cirrhosis of liver without alcohol |

### Major mental health disorder

| Code   | Description                                                      |
|--------|------------------------------------------------------------------|
| 295.0x | Simple type schizophrenia                                        |
| 295.1x | Disorganized type schizophrenia                                  |
| 295.2x | Catatonic type schizophrenia                                     |
| 295.3x | Paranoid type schizophrenia                                      |
| 295.5x | Latent schizophrenia                                             |
| 295.6x | Residual schizophrenia                                           |
| 295.7x | Schizo-affective type schizophrenia                              |
| 295.8x | Other specified types of schizophrenia                           |
| 295.9x | Unspecified schizophrenia                                        |
| 301.22 | Schizotypal personality disorder                                 |
| 297.1  | Delusional disorder                                              |
| 297.3  | Shared psychotic disorder                                        |
| 296.4x | Bipolar I disorder, most recent episode (or current) manic       |
| 296.5x | Bipolar I disorder, most recent episode (or current) depressed   |
| 296.6x | Bipolar I disorder, most recent episode (or current) mixed       |
| 296.7  | Bipolar I disorder, most recent episode (or current) unspecified |
| 296.8x | Other and unspecified bipolar disorders                          |
| 296.3x | Major depressive disorder recurrent episode                      |
| 297.9  | Unspecified paranoid state                                       |
| 298.9  | Unspecified psychosis                                            |
| 300.21 | Agoraphobia with panic disorder                                  |
| 300.3  | Obsessive-compulsive disorders                                   |
| 303.x  | Alcohol dependence syndrome                                      |
| 304.2x | Cocaine dependence                                               |
| 304.0x | Opioid type dependence                                           |
| 304.7x | Combinations of opioid type drug with any other drug dependence  |
| 299.x  | Pervasive developmental disorders                                |
| 307.1  | Anorexia nervosa                                                 |
| 307.51 | Bulimia nervosa                                                  |

### Alcohol abuse

| Code   | Description                 |
|--------|-----------------------------|
| 303.x  | Alcohol dependence syndrome |
| 305.0x | Nondependent alcohol abuse  |

### Opioid abuse

| Code | Description |
|------|-------------|
|------|-------------|

|        |                                                                 |
|--------|-----------------------------------------------------------------|
| 304.0x | Opioid type dependence                                          |
| 304.7x | Combinations of opioid type drug with any other drug dependence |
| 305.5x | Nondependent opioid abuse                                       |

#### Cocaine abuse

| Code   | Description                |
|--------|----------------------------|
| 304.2x | Cocaine dependence         |
| 305.6x | Nondependent cocaine abuse |

#### Heart failure

| Code   | Description                                                                                                                                             |
|--------|---------------------------------------------------------------------------------------------------------------------------------------------------------|
| 398.91 | Rheumatic heart failure (congestive)                                                                                                                    |
| 402.01 | Malignant hypertensive heart disease with heart failure                                                                                                 |
| 402.11 | Benign hypertensive heart disease with heart failure                                                                                                    |
| 402.91 | Unspecified hypertensive heart disease with heart failure                                                                                               |
| 404.01 | Hypertensive heart and chronic kidney disease, malignant, with heart failure and with chronic kidney disease stage I through stage IV, or unspecified   |
| 404.03 | Hypertensive heart and chronic kidney disease, malignant, with heart failure and with chronic kidney disease stage V or end stage renal disease         |
| 404.11 | Hypertensive heart and chronic kidney disease, benign, with heart failure and with chronic kidney disease stage I through stage IV, or unspecified      |
| 404.13 | Hypertensive heart and chronic kidney disease, benign, with heart failure and chronic kidney disease stage V or end stage renal disease                 |
| 404.91 | Hypertensive heart and chronic kidney disease, unspecified, with heart failure and with chronic kidney disease stage I through stage IV, or unspecified |
| 404.93 | Hypertensive heart and chronic kidney disease, unspecified, with heart failure and chronic kidney disease stage V or end stage renal disease            |
| 428.x  | Heart failure                                                                                                                                           |

#### Iatrogenic complications

| Code  | Description                       |
|-------|-----------------------------------|
| 244.0 | Postsurgical hypothyroidism       |
| 244.1 | Other postablative hypothyroidism |
| 244.2 | Iodine hypothyroidism             |
| 244.3 | Other iatrogenic hypothyroidism   |
| 245.4 | Iatrogenic thyroiditis (          |
| 251.0 | Hypoglycemic coma                 |
| 251.3 | Postsurgical hypoinsulinemia      |
| 253.7 | Iatrogenic pituitary disorders    |

|        |                                                                                     |
|--------|-------------------------------------------------------------------------------------|
| 276.61 | Transfusion associated circulatory overload                                         |
| 277.83 | Iatrogenic carnitine deficiency                                                     |
| 277.88 | Tumor lysis syndrome                                                                |
| 285.3  | Antineoplastic chemotherapy induced anemia                                          |
| 287.41 | Posttransfusion purpura                                                             |
| 338.12 | Acute postthoracotomy pain (                                                        |
| 338.18 | Other acute postoperative pain                                                      |
| 338.22 | Chronic postthoracotomy pain                                                        |
| 338.28 | Other chronic postoperative pain                                                    |
| 349.0  | Reaction to spinal or lumbar puncture                                               |
| 349.1  | Nervous system complications from surgically implanted device                       |
| 349.31 | Accidental puncture or laceration of dura during a procedure                        |
| 415.11 | Iatrogenic pulmonary embolism and infarction                                        |
| 429.4  | Functional disturbances following cardiac surgery                                   |
| 458.2  | Iatrogenic hypotension                                                              |
| 458.21 | Hypotension of hemodialysis                                                         |
| 458.29 | Other iatrogenic hypotension                                                        |
| 512.1  | Iatrogenic pneumothorax                                                             |
| 512.2  | Postoperative air leak                                                              |
| 518.4  | Acute edema of lung unspecified                                                     |
| 518.7  | Transfusion related acute lung injury (TRALI)                                       |
| 519.0  | Tracheostomy complications                                                          |
| 519.00 | Tracheostomy complication unspecified                                               |
| 519.01 | Infection of tracheostomy                                                           |
| 519.02 | Mechanical complication of tracheostomy                                             |
| 519.09 | Other tracheostomy complications                                                    |
| 523.2  | Gingival recession                                                                  |
| 530.86 | Infection of esophagostomy                                                          |
| 530.87 | Mechanical complication of esophagostomy                                            |
| 536.4  | Gastrostomy complications                                                           |
| 536.40 | Gastrostomy complication unspecified                                                |
| 536.41 | Infection of gastrostomy                                                            |
| 536.42 | Mechanical complication of gastrostomy                                              |
| 536.49 | Other gastrostomy complications                                                     |
| 539.x  | Complications of bariatric procedures                                               |
| 551.21 | Incisional ventral hernia with gangrene                                             |
| 553.21 | Incisional hernia without obstruction or gangrene                                   |
| 560.81 | Intestinal or peritoneal adhesions with obstruction (postoperative) (postinfection) |
| 564.2  | Postgastric surgery syndromes                                                       |
| 564.3  | Vomiting following gastrointestinal surgery                                         |
| 564.4  | Other postoperative functional disorders                                            |

|        |                                                                               |
|--------|-------------------------------------------------------------------------------|
| 568.0  | Peritoneal adhesions (postoperative) (postinfection)                          |
| 569.6  | Colostomy and enterostomy complications                                       |
| 569.62 | Mechanical complication of colostomy and enterostomy                          |
| 569.7x | Other disorders of intestine: Complications of intestinal pouch               |
| 579.2  | Blind loop syndrome                                                           |
| 579.3  | Other and unspecified postsurgical non absorption                             |
| 593.3  | Stricture or kinking of ureter                                                |
| 596.81 | Infection of cystostomy                                                       |
| 598.2  | Postoperative urethral stricture                                              |
| 614.6  | Pelvic peritoneal adhesions female (postoperative) (post infection)           |
| 728.13 | Postoperative heterotopic calcification                                       |
| 780.62 | Postprocedural fever                                                          |
| 780.63 | Postvaccination fever                                                         |
| 780.66 | Febrile nonhemolytic transfusion reaction                                     |
| 909.3  | Late effect of complications of surgical and medical care                     |
| 995.24 | Failed moderate sedation during procedure                                     |
| 995.4  | Shock due to anesthesia                                                       |
| 995.86 | Malignant hyperthermia                                                        |
| 997.x  | Complications affecting specified body system not elsewhere classified        |
| 997.99 | Complications affecting other specified body systems not elsewhere classified |
| 998.x  | Other complications of procedures not elsewhere classified                    |
| 999.x  | Complications of medical care not elsewhere classified                        |
| V15.53 | Personal history of retained foreign body fully removed                       |
| V15.80 | Personal history of failed moderate sedation                                  |
| V15.83 | Personal history of underimmunization status                                  |
| V90.01 | Retained depleted uranium fragments                                           |
| V90.09 | Other retained radioactive fragments                                          |

## **SECTION E. ASSESMENT OF SOCIOECONOMIC STATUS, COVARIATES, AND STUDY ENDPOINTS**

### **Assessment of individual socioeconomic status**

The methodology for the assessment of individual SES has been previously reported by our group.<sup>14,15</sup> Briefly, in the CHSS database, information on individual annual income (classified as < €18 000, €18 000–€100 000, > €100 000) is recorded and updated on a yearly basis, as well as information on receipt of welfare economic support by the government. For the purposes of our study, these variables were assessed for all patients at the time of the index admission. We defined 4 individual income categories: an annual income > €100 000 was considered “high” income, €18 000–€100 000 was considered “medium” income, and < €18 000 was considered “low” income. These 3 categories included both active workers and retired individuals receiving a retirement pension. Finally, individuals receiving welfare support from the government were considered to have “very low income”. This categorization mirrors that used in Catalonia for pharmaceutical copayment purposes. For the present analysis, we grouped patients with medium and high income into a single category. Information on education level was not available in the database.

### **Assessment of covariates and comorbidities**

Information on relevant covariates including age, sex, and comorbidities available at the time of the index admission was used for all patients. Specifically for comorbidities, we used the “adjusted morbidity groups” (GMA [Catalan acronym for “Grups de Morbiditat Ajustats”]) comorbidity classification system.<sup>14,18,19</sup> The GMA system has been developed specifically for the Catalan health care system and includes 31 mutually exclusive categories of morbidity and complexity (social features

not included) and can be expressed as a single GMA index. Importantly, the GMA system has shown to outperform the Charlson comorbidity index in the Catalan population in terms of its ability to predict incident urgent hospitalizations. For the present study, based on the distribution of GMAs within the HF study population, 4 GMA risk strata were defined: low, intermediate, high and very high.

### **Ascertainment of study endpoints**

Urgent clinically-related re-hospitalization (ie, unplanned hospitalization, as opposed to planned hospitalizations, such as those for diagnostic or surgical procedures) was the primary endpoint of our study. HF rehospitalizations and all-cause death were the secondary endpoints of the study.

Clinically-related hospital readmissions were defined using the Chronic Condition Indicator criteria of the ICD-9-CM of the Agency for Healthcare Research and Quality.<sup>20</sup>

Accordingly, clinically-related readmissions can be cataloged as: *a)* recurrences when the primary diagnosis includes diagnostic coding of circulatory or heart disease (07-Diseases of the circulatory system, according to CCI), or when the primary diagnosis is acute respiratory failure and the principal secondary diagnosis is heart failure with no external cause; *b)* admission due to pre-existing chronic conditions when the primary diagnosis of the episode includes diagnostic coding consistent with chronic pre-existing disease not involving the circulatory system and having no external cause; and *c)* admission due to complications when the primary diagnosis includes diagnostic coding consistent with complications associated with or caused by the medical care received during the index hospitalization. Complications are listed in section D of the supplementary data (iatrogenic complications). HF readmissions were defined using the same coding criteria used for the index HF admission and are also listed in the section D of the supplementary data.



## **SECTION F. STATISTICAL ASPECTS OF THE STUDY**

The baseline characteristics of the study population are described overall and by several strata including health care area (CatSalut vs HUB-DELTA), study periods and individual income (SES groups). Categorical variables are reported using number and proportion, and continuous variables using mean and standard deviation. Characteristics were compared across the different strata using the chi-square, Student t-test, 1-way ANOVA or nonparametric tests, as appropriate.

First, multivariate adjusted Cox proportional hazards models analyzing the determinants of clinically-related readmission, HF readmission and all-cause death in patients discharged alive with a primary diagnosis of HF in Catalonia between January 1, 2015 and December 31, 2019 were conducted. All models were adjusted for age, sex, individual SES, previous hospitalization, comorbidities (using the GMA morbidity index) and time since diagnosis of HF.

Next, the risk of the occurrence of clinical endpoints according to SES after discharge across the predefined time periods was explored using multivariate Cox proportional hazards models in patients discharged alive with a primary diagnosis of HF in Catalonia and the HUB-DELTA area between January 1, and December 31, 2019.

Multivariate Cox proportional hazards models were used to assess the multivariable-adjusted effect on clinical outcomes of the implementation of the hospital-primary care integrated HF program in the HUB-DELTA health care area. Primary and secondary endpoints were analyzed across years and predefined time periods according to health care setting in models adjusted for individual SES, sex, age, previous hospitalization, comorbidities (morbidity index: GMA) and time since diagnosis of HF.

To explore the effect of the program according to individual SES, several multivariable (adjusted) Cox proportional models evaluating the impact on clinical outcomes across years and predefined time periods according to health care setting (HUB-DELTA area vs rest of CatSalut) and

stratified by SES were conducted. The effect of the interaction between individual SES and health care area (HUB-DELTA vs rest of CatSalut) across study periods was further explored in similar models.

For this analysis, the adjusted probabilities of experiencing any of the clinical events studied here are graphically represented, according to the period, and stratified by individual SES based on Cox proportional hazards models.

All statistical tests and confidence intervals (CI) were constructed with a type I error alpha level of 5%, with no adjustments for multiplicity. *P* values below .05 were considered statistically significant. All analyses were performed using R software (version 4.0.2; R Foundation for Statistical Computing, Vienna, Austria).

**Table 1 of the supplementary data.** Baseline clinical characteristics including socioeconomic status of patients discharged alive with a primary diagnosis of HF in Catalonia between January 1, 2015 and December 31, 2019 overall and according to the 3 predefined time

|                                 | Overall       | 2015-2016     | 2017          | 2018-2019     | P      |
|---------------------------------|---------------|---------------|---------------|---------------|--------|
|                                 | N = 77 554    | n = 30 566    | n = 14 581    | n = 32 407    |        |
| <i>Individual annual income</i> |               |               |               |               | < .001 |
| Medium or high SES              | 12 018 (15.5) | 4174 (13.7)   | 2340 (16.1)   | 5504 (17.0)   |        |
| Low SES                         | 61 967 (79.9) | 24 884 (81.4) | 11 571 (79.4) | 25 512 (78.8) |        |
| Very low SES                    | 3535 (4.56)   | 1496 (4.90)   | 663 (4.55)    | 1376 (4.25)   |        |
| <i>Sex</i>                      |               |               |               |               | .011   |
| Male                            | 35 895 (46.3) | 13 973 (45.7) | 6880 (47.2)   | 15 042 (46.4) |        |
| Female                          | 41 659 (53.7) | 16 593 (54.3) | 7701 (52.8)   | 17 365 (53.6) |        |
| <i>Age, y</i>                   | 79.8 ± 10.8   | 79.4 ± 10.8   | 79.3 ± 10.9   | 80.4 ± 10.7   | < .001 |
| <i>Age group, y</i>             |               |               |               |               | < .001 |
| 15-49                           | 1212 (1.56)   | 488 (1.60)    | 252 (1.73)    | 472 (1.46)    |        |
| 50-64                           | 6009 (7.75)   | 2375 (7.78)   | 1232 (8.45)   | 2402 (7.41)   |        |
| 65-74                           | 12 372 (16.0) | 5000 (16.4)   | 2506 (17.2)   | 4866 (15.0)   |        |
| 75-84                           | 28 054 (36.2) | 11 772 (38.6) | 5250 (36.0)   | 11 032 (34.0) |        |
| >84                             | 29 876 (38.5) | 10 900 (35.7) | 5341 (36.6)   | 13 635 (42.1) |        |

|                                    | Overall       | 2015-2016     | 2017          | 2018-2019     | P      |
|------------------------------------|---------------|---------------|---------------|---------------|--------|
| <i>Morbidity burden (GMA)</i>      | 37.9 ± 16.4   | 35.1 ± 15.8   | 38.0 ± 16.1   | 40.5 ± 16.7   | .000   |
| <i>Risk levels (GMA)</i>           |               |               |               |               | < .001 |
| Low risk                           | 1793 (2.31)   | 1045 (3.42)   | 275 (1.89)    | 473 (1.46)    |        |
| Intermediate risk                  | 12 188 (15.7) | 5859 (19.2)   | 2260 (15.5)   | 4069 (12.6)   |        |
| High risk                          | 32 138 (41.4) | 13 185 (43.1) | 6103 (41.9)   | 12 850 (39.7) |        |
| Very high risk                     | 31 435 (40.5) | 10 477 (34.3) | 5943 (40.8)   | 15 015 (46.3) |        |
| <i>Years since HF diagnosis</i>    |               |               |               |               | < .001 |
| < 1                                | 32 738 (42.2) | 13 283 (43.5) | 6173 (42.3)   | 13 282 (41.0) |        |
| 1-2                                | 13 396 (17.3) | 5657 (18.5)   | 2499 (17.1)   | 5240 (16.2)   |        |
| 3-5                                | 14 986 (19.3) | 6091 (19.9)   | 2760 (18.9)   | 6135 (18.9)   |        |
| > 5                                | 16 434 (21.2) | 5535 (18.1)   | 3149 (21.6)   | 7750 (23.9)   |        |
| <i>Previous MI</i>                 | 15 794 (20.4) | 6188 (20.2)   | 2895 (19.9)   | 6711 (20.7)   | .083   |
| <i>Atrial fibrillation</i>         | 28 780 (37.1) | 6284 (20.6)   | 4973 (34.1)   | 17 523 (54.1) | .000   |
| <i>Peripheral vascular disease</i> | 19 196 (24.8) | 7161 (23.4)   | 3532 (24.2)   | 8503 (26.2)   | < .001 |
| <i>Hypertension</i>                | 70 649 (91.2) | 27 736 (90.8) | 13 255 (91.0) | 29 658 (91.6) | .003   |
| <i>Obesity</i>                     | 25 945 (33.5) | 5811 (19.0)   | 4577 (31.4)   | 15 557 (48.0) | .000   |
| <i>Smoking habit</i>               | 17 326 (22.3) | 3908 (12.8)   | 3201 (22.0)   | 10 217 (31.5) | .000   |
| <i>Hyperlipidemia</i>              | 31 593 (40.7) | 7299 (23.9)   | 5396 (37.0)   | 18 898 (58.3) | .000   |
| <i>Diabetes mellitus</i>           | 39 684 (51.2) | 15 862 (51.9) | 7380 (50.6)   | 16 442 (50.8) | .004   |
| <i>CKD</i>                         | 41 498 (53.5) | 15 586 (51.0) | 7723 (53.0)   | 18 189 (56.2) | < .001 |
| <i>Anemia</i>                      | 43 515 (56.1) | 16 445 (53.8) | 8077 (55.4)   | 18 993 (58.6) | < .001 |

|                                                              | Overall       | 2015-2016     | 2017        | 2018-2019     | P      |
|--------------------------------------------------------------|---------------|---------------|-------------|---------------|--------|
| <i>COPD</i>                                                  | 32 703 (42.2) | 12 736 (41.7) | 6088 (41.8) | 13 879 (42.9) | .007   |
| <i>Cancer</i>                                                | 11 994 (15.5) | 4682 (15.3)   | 2002 (13.7) | 5310 (16.4)   | < .001 |
| <i>Osteoarthritis</i>                                        | 10 218 (13.2) | 3459 (11.3)   | 1812 (12.4) | 4947 (15.3)   | < .001 |
| <i>Severe cognitive impairment</i>                           | 5904 (7.62)   | 1930 (6.32)   | 1031 (7.07) | 2943 (9.09)   | < .001 |
| <i>Cirrhosis</i>                                             | 1657 (2.14)   | 600 (1.96)    | 359 (2.46)  | 698 (2.16)    | .003   |
| <i>Major mental health disorder</i>                          | 9501 (12.3)   | 3309 (10.8)   | 1834 (12.6) | 4358 (13.4)   | < .001 |
| <i>Alcohol abuse</i>                                         | 9201 (11.9)   | 3322 (10.9)   | 1859 (12.7) | 4020 (12.4)   | < .001 |
| <i>Opioid abuse</i>                                          | 510 (0.66)    | 162 (0.53)    | 112 (0.77)  | 236 (0.73)    | .002   |
| <i>Cocaine abuse</i>                                         | 348 (0.45)    | 102 (0.33)    | 65 (0.45)   | 181 (0.56)    | < .001 |
| <i>Number of previous hospital admissions</i>                | 1.13 ± 1.59   | 1.18 ± 1.62   | 1.05 ± 1.48 | 1.11 ± 1.62   | < .001 |
| <i>Number of days in hospital (previous)</i>                 | 9.65 ± 16.0   | 10.00 ± 16.3  | 9.15 ± 15.5 | 9.56 ± 15.9   | < .001 |
| <i>Number of days in psychiatric unit (previous)</i>         | 0.03 ± 1.48   | 0.03 ± 1.58   | 0.04 ± 1.92 | 0.03 ± 1.12   | .963   |
| <i>Number of days in skilled nursing facility (previous)</i> | 3.19 ± 18.2   | 2.20 ± 14.6   | 2.99 ± 18.0 | 4.22 ± 21.0   | < .001 |
| <i>Number of days in nursing home (previous)</i>             | 27.1 ± 92.0   | 28.2 ± 93.5   | 25.6 ± 89.9 | 26.8 ± 91.6   | .016   |

CKD, chronic kidney disease; COPD, chronic obstructive pulmonary disease; GMA, adjusted morbidity groups; HF, heart failure; MI, myocardial infarction; SES, socioeconomic status.

The data are presented as mean ± standard deviation or No. (%).

**Table 2 of the supplementary data.** Baseline clinical characteristics including the SES of patients discharged alive with a primary diagnosis of HF in HUB-DELTA health care area between January 1, 2015 and December 31, 2019 according to 3 predefined time periods

|                                 | Total       | 2015-2016   | 2017        | 2018-2019   | P      |
|---------------------------------|-------------|-------------|-------------|-------------|--------|
|                                 | N = 3396    | n = 1622    | n = 724     | n = 1050    |        |
| <i>Individual annual income</i> |             |             |             |             | .081   |
| Medium or high SES              | 550 (16.2)  | 257 (15.8)  | 105 (14.5)  | 188 (17.9)  |        |
| Low SES                         | 2669 (78.6) | 1267 (78.1) | 588 (81.2)  | 814 (77.5)  |        |
| Very low SES                    | 177 (5.21)  | 98 (6.04)   | 31 (4.28)   | 48 (4.57)   |        |
| <i>Sex</i>                      |             |             |             |             | .458   |
| Male                            | 1599 (47.1) | 772 (47.6)  | 349 (48.2)  | 478 (45.5)  |        |
| Female                          | 1797 (52.9) | 850 (52.4)  | 375 (51.8)  | 572 (54.5)  |        |
| <i>Age, y</i>                   | 79.4 ± 9.96 | 79.1 ± 9.53 | 79.2 ± 9.89 | 80.0 ± 10.6 | .062   |
| <i>Age group, y</i>             |             |             |             |             | < .001 |
| 15-49                           | 40 (1.18)   | 16 (0.99)   | 9 (1.24)    | 15 (1.43)   |        |
| 50-64                           | 243 (7.16)  | 118 (7.27)  | 42 (5.80)   | 83 (7.90)   |        |
| 65-74                           | 584 (17.2)  | 294 (18.1)  | 132 (18.2)  | 158 (15.0)  |        |
| 75-84                           | 1367 (40.3) | 699 (43.1)  | 306 (42.3)  | 362 (34.5)  |        |
| >84                             | 1162 (34.2) | 495 (30.5)  | 235 (32.5)  | 432 (41.1)  |        |
| <i>Morbidity burden (GMA)</i>   | 37.0 ± 15.8 | 35.6 ± 15.3 | 38.1 ± 15.9 | 38.5 ± 16.4 | < .001 |
| <i>Risk levels (GMA)</i>        |             |             |             |             | < .001 |
| Low risk                        | 66 (1.94)   | 40 (2.47)   | 15 (2.07)   | 11 (1.05)   |        |

|                                    | Total       | 2015-2016   | 2017       | 2018-2019  | P      |
|------------------------------------|-------------|-------------|------------|------------|--------|
| Intermediate risk                  | 560 (16.5)  | 297 (18.3)  | 110 (15.2) | 153 (14.6) |        |
| High risk                          | 1482 (43.6) | 731 (45.1)  | 296 (40.9) | 455 (43.3) |        |
| Very high risk                     | 1288 (37.9) | 554 (34.2)  | 303 (41.9) | 431 (41.0) |        |
| <i>Years since HF diagnosis:</i>   |             |             |            |            | .002   |
| < 1                                | 1384 (40.8) | 670 (41.3)  | 285 (39.4) | 429 (40.9) |        |
| 1-2                                | 587 (17.3)  | 315 (19.4)  | 118 (16.3) | 154 (14.7) |        |
| 3-5                                | 692 (20.4)  | 332 (20.5)  | 151 (20.9) | 209 (19.9) |        |
| > 5                                | 733 (21.6)  | 305 (18.8)  | 170 (23.5) | 258 (24.6) |        |
| <i>Previous MI</i>                 | 665 (19.6)  | 325 (20.0)  | 159 (22.0) | 181 (17.2) | .039   |
| <i>Atrial fibrillation</i>         | 1221 (36.0) | 359 (22.1)  | 278 (38.4) | 584 (55.6) | < .001 |
| <i>Peripheral vascular disease</i> | 930 (27.4)  | 410 (25.3)  | 211 (29.1) | 309 (29.4) | .031   |
| <i>Hypertension</i>                | 3095 (91.2) | 1480 (91.3) | 665 (91.9) | 950 (90.5) | .583   |
| <i>Obesity</i>                     | 1096 (32.3) | 327 (20.2)  | 255 (35.2) | 514 (49.0) | < .001 |
| <i>Smoking</i>                     | 809 (23.8)  | 250 (15.4)  | 180 (24.9) | 379 (36.1) | < .001 |
| <i>Hyperlipidemia</i>              | 1431 (42.1) | 441 (27.2)  | 314 (43.4) | 676 (64.4) | < .001 |
| <i>Diabetes mellitus</i>           | 1733 (51.0) | 832 (51.3)  | 372 (51.4) | 529 (50.4) | .874   |
| <i>CKD</i>                         | 1901 (56.0) | 885 (54.6)  | 400 (55.2) | 616 (58.7) | .106   |
| <i>Anemia</i>                      | 1840 (54.2) | 828 (51.0)  | 383 (52.9) | 629 (59.9) | < .001 |
| <i>COPD</i>                        | 1440 (42.4) | 717 (44.2)  | 314 (43.4) | 409 (39.0) | .022   |
| <i>Cancer</i>                      | 575 (16.9)  | 273 (16.8)  | 122 (16.9) | 180 (17.1) | .976   |
| <i>Osteoarthritis</i>              | 361 (10.6)  | 155 (9.56)  | 79 (10.9)  | 127 (12.1) | .112   |

|                                                              | Total       | 2015-2016   | 2017        | 2018-2019   | P      |
|--------------------------------------------------------------|-------------|-------------|-------------|-------------|--------|
| <i>Severe cognitive impairment</i>                           | 194 (5.71)  | 79 (4.87)   | 31 (4.28)   | 84 (8.00)   | .001   |
| <i>Cirrhosis</i>                                             | 77 (2.27)   | 33 (2.04)   | 17 (2.35)   | 27 (2.57)   | .653   |
| <i>Major mental health disorder</i>                          | 411 (12.1)  | 163 (10.0)  | 108 (14.9)  | 140 (13.3)  | .001   |
| <i>Alcohol abuse</i>                                         | 645 (19.0)  | 299 (18.4)  | 150 (20.7)  | 196 (18.7)  | .406   |
| <i>Opioid abuse</i>                                          | 12 (0.35)   | 2 (0.12)    | 6 (0.83)    | 4 (0.38)    | .026   |
| <i>Cocaine abuse</i>                                         | 13 (0.38)   | 4 (0.25)    | 3 (0.41)    | 6 (0.57)    | .363   |
| <i>Number of previous hospital admissions</i>                | 1.22 ± 1.55 | 1.34 ± 1.63 | 1.26 ± 1.58 | 1.01 ± 1.38 | < .001 |
| <i>Number of days in hospital (previous)</i>                 | 9.42 ± 15.6 | 9.93 ± 15.1 | 9.50 ± 15.9 | 8.57 ± 16.0 | .087   |
| <i>Number of days in psychiatric unit (previous)</i>         | 0.03 ± 0.91 | 0.02 ± 0.82 | 0.01 ± 0.37 | 0.05 ± 1.24 | .561   |
| <i>Number of days in skilled nursing facility (previous)</i> | 2.78 ± 18.8 | 3.28 ± 22.4 | 1.96 ± 13.4 | 2.58 ± 15.7 | .267   |
| <i>Number of days in nursing home (previous)</i>             | 15.0 ± 69.6 | 20.2 ± 79.6 | 12.8 ± 65.6 | 8.43 ± 53.2 | < .001 |

CKD, chronic kidney disease; COPD, chronic obstructive pulmonary disease; GMA, adjusted morbidity groups; HF, heart failure; MI, myocardial infarction; SES, socioeconomic status.

The data are presented as mean ± SD or No. (%).



**Table 3 of the supplementary data.** Baseline characteristics of patients included in the study in Catalonia between January 1, 2015 and December 31, 2019, according to SES

|                                 | Total         | Medium or high SES | Low SES       | Very low SES | P      |
|---------------------------------|---------------|--------------------|---------------|--------------|--------|
|                                 | N = 77 520    | n = 12 018         | n = 61 967    | n = 3535     |        |
| <i>Sex</i>                      |               |                    |               |              | .001   |
| Male                            | 35 883 (46.3) | 7646 (63.6)        | 26 926 (43.5) | 1311 (37.1)  |        |
| Female                          | 41 637 (53.7) | 4372 (36.4)        | 35 041 (56.5) | 2224 (62.9)  |        |
| <i>Age, y</i>                   | 79.8 ± 10.8   | 78.6 ± 10.6        | 80.5 ± 10.5   | 71.8 ± 13.1  | .001   |
| <i>Age group, y</i>             |               |                    |               |              | .001   |
| 15-49                           | 1211 (1.56)   | 165 (1.37)         | 857 (1.38)    | 189 (5.35)   |        |
| 50-64                           | 6005 (7.75)   | 1021 (8.50)        | 4172 (6.73)   | 812 (23.0)   |        |
| 65-74                           | 12 367 (16.0) | 2478 (20.6)        | 9010 (14.5)   | 879 (24.9)   |        |
| 75-84                           | 28 042 (36.2) | 4413 (36.7)        | 22 578 (36.4) | 1051 (29.8)  |        |
| > 84                            | 29 864 (38.5) | 3934 (32.8)        | 25 331 (40.9) | 599 (17.0)   |        |
| <i>Morbidity burden (GMA)</i>   | 37.9 ± 16.4   | 36.3 ± 16.6        | 38.1 ± 16.3   | 39.3 ± 17.8  | < .001 |
| <i>Risc levels (GMA)</i>        |               |                    |               |              | < .001 |
| Low risk                        | 1783 (2.30)   | 399 (3.32)         | 1273 (2.05)   | 111 (3.14)   |        |
| Intermediate risk               | 12 177 (15.7) | 2184 (18.2)        | 9481 (15.3)   | 512 (14.5)   |        |
| High risk                       | 32 127 (41.4) | 4923 (41.0)        | 25 836 (41.7) | 1368 (38.7)  |        |
| Very high risk                  | 31 433 (40.5) | 4512 (37.5)        | 25 377 (41.0) | 1544 (43.7)  |        |
| <i>Years since HF diagnosis</i> |               |                    |               |              | < .001 |
| < 1                             | 32 713 (42.2) | 5764 (48.0)        | 25 590 (41.3) | 1359 (38.4)  |        |

|                              |               |               |               |             |        |
|------------------------------|---------------|---------------|---------------|-------------|--------|
| 1-2                          | 13 392 (17.3) | 2051 (17.1)   | 10 718 (17.3) | 623 (17.6)  |        |
| 3-5                          | 14 984 (19.3) | 2152 (17.9)   | 12 169 (19.6) | 663 (18.8)  |        |
| > 5                          | 16 431 (21.2) | 2051 (17.1)   | 13 490 (21.8) | 890 (25.2)  |        |
| Previous MI                  | 15 789 (20.4) | 2662 (22.2)   | 12 412 (20.0) | 715 (20.2)  | < .001 |
| Atrial fibrillation          | 28 780 (37.1) | 4764 (39.6)   | 22 909 (37.0) | 1107 (31.3) | < .001 |
| Peripheral vascular disease  | 19 196 (24.8) | 3131 (26.1)   | 15 110 (24.4) | 955 (27.0)  | < .001 |
| Hypertension                 | 70 627 (91.2) | 10 705 (89.3) | 56 815 (91.7) | 3107 (87.9) | < .001 |
| Obesity                      | 25 945 (33.5) | 3802 (31.6)   | 20 828 (33.6) | 1315 (37.2) | < .001 |
| Smoking                      | 17 326 (22.4) | 3484 (29.0)   | 12 831 (20.7) | 1011 (28.6) | < .001 |
| Hyperlipidemia               | 31 593 (40.8) | 5215 (43.4)   | 24 918 (40.2) | 1460 (41.3) | < .001 |
| Diabetes mellitus            | 39 673 (51.2) | 5914 (49.3)   | 31 764 (51.3) | 1995 (56.4) | < .001 |
| CKD                          | 41 488 (53.6) | 6204 (51.7)   | 33 510 (54.1) | 1774 (50.2) | < .001 |
| Anemia                       | 43 505 (56.1) | 6248 (52.0)   | 35 265 (56.9) | 1992 (56.4) | < .001 |
| COPD                         | 32 692 (42.2) | 4906 (40.9)   | 26 278 (42.4) | 1508 (42.7) | .007   |
| Cancer                       | 11 993 (15.5) | 2073 (17.2)   | 9531 (15.4)   | 389 (11.0)  | < .001 |
| Osteoarthritis               | 10 218 (13.2) | 1465 (12.2)   | 8285 (13.4)   | 468 (13.2)  | .003   |
| Severe cognitive impairment  | 5904 (7.62)   | 697 (5.81)    | 4988 (8.05)   | 219 (6.20)  | < .001 |
| Cirrhosis                    | 1657 (2.14)   | 244 (2.03)    | 1323 (2.14)   | 90 (2.55)   | .180   |
| Major mental health disorder | 9498 (12.3)   | 1204 (10.0)   | 7585 (12.2)   | 709 (20.1)  | < .001 |
| Alcohol abuse                | 9199 (11.9)   | 1490 (12.4)   | 7109 (11.5)   | 600 (17.0)  | < .001 |
| Opioid abuse                 | 510 (0.66)    | 53 (0.44)     | 384 (0.62)    | 73 (2.07)   | < .001 |
| Cocaine abuse                | 348 (0.45)    | 6 (0.05)      | 237 (0.38)    | 105 (2.97)  | < .001 |

|                                                       |             |             |             |             |        |
|-------------------------------------------------------|-------------|-------------|-------------|-------------|--------|
| Number of previous hospital admissions                | 1.13 ± 1.59 | 1.02 ± 1.44 | 1.12 ± 1.57 | 1.53 ± 2.34 | < .001 |
| Number of days in hospital (previous)                 | 9.66 ± 16.0 | 8.86 ± 15.5 | 9.65 ± 15.8 | 12.5 ± 19.1 | < .001 |
| Number of days in psychiatric unit (previous)         | 0.03 ± 1.48 | 0.02 ± 0.75 | 0.04 ± 1.56 | 0.06 ± 1.85 | .364   |
| Number of days in skilled nursing facility (previous) | 3.19 ± 18.2 | 2.79 ± 16.8 | 3.26 ± 18.4 | 3.34 ± 19.7 | .030   |
| Number of days in nursing home (previous)             | 27.1 ± 92.0 | 16.2 ± 71.7 | 29.4 ± 95.5 | 24.9 ± 88.6 | < .001 |

CKD, chronic kidney disease; COPD, chronic obstructive pulmonary disease; GMA, adjusted morbidity groups; HF, heart failure; MI, myocardial infarction; SES, socioeconomic status.

The data are presented as mean ± standard deviation or No. (%).

**Table 4 of the supplementary data.** Baseline characteristics of patients in the HUB-DELTA health care area between January 1, 2015 and December 31, 2019 according to SES

|                                 | Total       | Medium or high SES | Low SES     | Very low SES | P      |
|---------------------------------|-------------|--------------------|-------------|--------------|--------|
|                                 | N = 3396    | n = 550            | n = 2669    | n = 177      |        |
| <i>Gender</i>                   |             |                    |             |              | < .001 |
| Male                            | 1599 (47.1) | 381 (69.3)         | 1177 (44.1) | 41 (23.2)    |        |
| Female                          | 1797 (52.9) | 169 (30.7)         | 1492 (55.9) | 136 (76.8)   |        |
| <i>Age, y</i>                   | 79.4 (9.96) | 76.7 (9.55)        | 80.3 (9.73) | 73.8 (11.1)  | < .001 |
| <i>Age group</i>                |             |                    |             |              | .      |
| 15-49                           | 40 (1.18)   | 5 (0.91)           | 30 (1.12)   | 5 (2.82)     |        |
| 50-64                           | 243 (7.16)  | 56 (10.2)          | 159 (5.96)  | 28 (15.8)    |        |
| 65-74                           | 584 (17.2)  | 146 (26.5)         | 390 (14.6)  | 48 (27.1)    |        |
| 75-84                           | 1367 (40.3) | 217 (39.5)         | 1081 (40.5) | 69 (39.0)    |        |
| > 84                            | 1162 (34.2) | 126 (22.9)         | 1009 (37.8) | 27 (15.3)    |        |
| <i>Morbidity burden (GMA)</i>   | 37.0 (15.8) | 34.8 (15.5)        | 37.4 (15.8) | 38.8 (16.7)  | .001   |
| <i>Risc levels (GMA)</i>        |             |                    |             |              | .      |
| Low risk                        | 66 (1.94)   | 19 (3.45)          | 42 (1.57)   | 5 (2.82)     |        |
| Intermediate risk               | 560 (16.5)  | 96 (17.5)          | 443 (16.6)  | 21 (11.9)    |        |
| High risk                       | 1482 (43.6) | 258 (46.9)         | 1150 (43.1) | 74 (41.8)    |        |
| Very high risk                  | 1288 (37.9) | 177 (32.2)         | 1034 (38.7) | 77 (43.5)    |        |
| <i>Years since HF diagnosis</i> |             |                    |             |              | < .001 |

|                                     | Total       | Medium or high SES | Low SES     | Very low SES | P      |
|-------------------------------------|-------------|--------------------|-------------|--------------|--------|
| < 1                                 | 1384 (40.8) | 251 (45.6)         | 1080 (40.5) | 53 (29.9)    |        |
| 1-2                                 | 587 (17.3)  | 89 (16.2)          | 476 (17.8)  | 22 (12.4)    |        |
| 3-5                                 | 692 (20.4)  | 93 (16.9)          | 559 (20.9)  | 40 (22.6)    |        |
| > 5                                 | 733 (21.6)  | 117 (21.3)         | 554 (20.8)  | 62 (35.0)    |        |
| <i>Previous MI</i>                  | 665 (19.6)  | 130 (23.6)         | 505 (18.9)  | 30 (16.9)    | .027   |
| <i>Atrial fibrillation</i>          | 1221 (36.0) | 192 (34.9)         | 967 (36.2)  | 62 (35.0)    | .812   |
| <i>Peripheral vascular disease</i>  | 930 (27.4)  | 145 (26.4)         | 739 (27.7)  | 46 (26.0)    | .746   |
| <i>Hypertension</i>                 | 3095 (91.2) | 479 (87.1)         | 2460 (92.2) | 156 (88.1)   | < .001 |
| <i>Obesity</i>                      | 1096 (32.3) | 185 (33.6)         | 838 (31.4)  | 73 (41.2)    | .019   |
| <i>Smoking habit</i>                | 809 (23.8)  | 177 (32.2)         | 597 (22.4)  | 35 (19.8)    | < .001 |
| <i>Hyperlipidemia</i>               | 1431 (42.1) | 249 (45.3)         | 1110 (41.6) | 72 (40.7)    | .259   |
| <i>Diabetes mellitus</i>            | 1733 (51.0) | 245 (44.5)         | 1391 (52.1) | 97 (54.8)    | .003   |
| <i>CKD</i>                          | 1901 (56.0) | 287 (52.2)         | 1546 (57.9) | 68 (38.4)    | < .001 |
| <i>Anemia</i>                       | 1840 (54.2) | 264 (48.0)         | 1478 (55.4) | 98 (55.4)    | .006   |
| <i>COPD</i>                         | 1440 (42.4) | 230 (41.8)         | 1110 (41.6) | 100 (56.5)   | .001   |
| <i>Cancer</i>                       | 575 (16.9)  | 103 (18.7)         | 457 (17.1)  | 15 (8.47)    | .006   |
| <i>Osteoarthritis</i>               | 361 (10.6)  | 71 (12.9)          | 268 (10.0)  | 22 (12.4)    | .102   |
| <i>Severe cognitive impairment</i>  | 194 (5.71)  | 11 (2.00)          | 173 (6.48)  | 10 (5.65)    | < .001 |
| <i>Cirrhosis</i>                    | 77 (2.27)   | 28 (5.09)          | 44 (1.65)   | 5 (2.82)     | < .001 |
| <i>Major mental health disorder</i> | 411 (12.1)  | 58 (10.5)          | 321 (12.0)  | 32 (18.1)    | .027   |
| <i>Alcohol abuse</i>                | 645 (19.0)  | 135 (24.5)         | 467 (17.5)  | 43 (24.3)    | < .001 |

|                                                              | Total       | Medium or high SES | Low SES     | Very low SES | P      |
|--------------------------------------------------------------|-------------|--------------------|-------------|--------------|--------|
| <i>Opioid abuse</i>                                          | 12 (0.35)   | 1 (0.18)           | 8 (0.30)    | 3 (1.69)     | .036   |
| <i>Cocaine abuse</i>                                         | 13 (0.38)   | 0 (0.00)           | 8 (0.30)    | 5 (2.82)     | < .001 |
| <i>Number of previous hospital admissions</i>                | 1.22 ± 1.55 | 1.10 ± 1.36        | 1.21 ± 1.55 | 1.76 ± 2.02  | < .001 |
| <i>Number of days in hospital (previous)</i>                 | 9.42 ± 15.6 | 9.22 ± 16.5        | 9.13 ± 14.9 | 14.4 ± 21.6  | < .001 |
| <i>Number of days in psychiatric unit (previous)</i>         | 0.03 ± 0.91 | 0.00 ± 0.00        | 0.03 ± 0.80 | 0.19 ± 2.48  | .052   |
| <i>Number of days in skilled nursing facility (previous)</i> | 2.78 ± 18.8 | 1.49 ± 9.12        | 3.14 ± 20.7 | 1.39 ± 9.13  | .105   |
| <i>Number of days in nursing home (previous)</i>             | 15.0 ± 69.6 | 3.38 ± 32.9        | 17.5 ± 75.0 | 13.0 ± 65.6  | < .001 |

±

CKD, chronic kidney disease; COPD, chronic obstructive pulmonary disease; GMA, adjusted morbidity groups; HF, heart failure; MI, myocardial infarction; SES, socioeconomic status.

The data are presented as mean ± standard deviation or No. (%).

**Table 5 of the supplementary data.** Multivariate adjusted Cox proportional hazards models analyzing the determinants of all-cause death, clinically-related readmission and HF readmission including socioeconomic status (SES) in patients discharged alive with a primary diagnosis of HF in Catalonia between January 1, 2015 and December 31, 2019

| All-cause death                                    |         |       |             |
|----------------------------------------------------|---------|-------|-------------|
| Variable                                           | $\beta$ | HR    | 95%CI       |
| <i>Individual annual income</i>                    |         |       |             |
| Medium or high SES                                 | 0.000   | 1.000 | —           |
| Low SES                                            | 0.069   | 1.071 | 1.039-1.104 |
| Very low SES                                       | 0.146   | 1.157 | 1.092-1.226 |
| <i>Sex</i>                                         |         |       |             |
| Male                                               | 0.000   | 1.000 | —           |
| Female                                             | -0.206  | 0.814 | 0.797-0.832 |
| <i>Age group, y</i>                                |         |       |             |
| 15-49                                              | 0.000   | 1.000 | —           |
| 50-64                                              | 0.666   | 1.946 | 1.645-2.301 |
| 65-74                                              | 1.072   | 2.920 | 2.480-3.437 |
| 75-84                                              | 1.489   | 4.433 | 3.770-5.212 |
| >84                                                | 2.081   | 8.016 | 6.818-9.425 |
| <i>Risk levels (Adjusted Morbidity Groups-GMA)</i> |         |       |             |
| Low risk                                           | 0.000   | 1.000 | —           |
| Intermediate risk                                  | 0.216   | 1.242 | 1.125-1.371 |
| High risk                                          | 0.490   | 1.632 | 1.482-1.798 |

| <b>All-cause death</b>                        |          |           |              |
|-----------------------------------------------|----------|-----------|--------------|
| <b>Variable</b>                               | <b>β</b> | <b>HR</b> | <b>95%CI</b> |
| Very high risk                                | 0.827    | 2.286     | 2.071-2.523  |
| <i>Years since HF diagnosis</i>               |          |           |              |
| <1                                            | 0.000    | 1.000     | —            |
| 1-2                                           | 0.213    | 1.237     | 1.201-1.274  |
| 3-5                                           | 0.200    | 1.222     | 1.187-1.258  |
| > 5                                           | 0.272    | 1.312     | 1.275-1.350  |
| <i>Number of previous hospital admissions</i> | 0.072    | 1.074     | 1.067-1.081  |
| <i>Area and period</i>                        |          |           |              |
| Rest of CatSalut 2015-2016                    | 0.000    | 1.000     | —            |
| Rest of CatSalut 2017                         | -0.108   | 0.898     | 0.873-0.923  |
| Rest of CatSalut 2018-2019                    | -0.156   | 0.856     | 0.833-0.879  |
| HUB-DELTA area 2015-2016                      | -0.083   | 0.920     | 0.865-0.979  |
| HUB-DELTA area 2017                           | -0.217   | 0.805     | 0.725-0.895  |
| HUB-DELTA area 2018-2019                      | -0.344   | 0.709     | 0.631-0.796  |



| CLINICALLY-RELATED READMISSION                     |         |       |             |
|----------------------------------------------------|---------|-------|-------------|
| Variable                                           | $\beta$ | HR    | 95%CI       |
| <i>Individual annual income</i>                    |         |       |             |
| Medium or high SES                                 | 0.000   | 1.000 | —           |
| Low SES                                            | 0.083   | 1.087 | 1.057-1.118 |
| Very low SES                                       | 0.165   | 1.179 | 1.121-1.240 |
| <i>Sex</i>                                         |         |       |             |
| Male                                               | 0.000   | 1.000 | —           |
| Female                                             | -0.140  | 0.869 | 0.852-0.887 |
| <i>Age group, y</i>                                |         |       |             |
| 15-49                                              | 0.000   | 1.000 | —           |
| 50-64                                              | 0.116   | 1.123 | 1.028-1.226 |
| 65-74                                              | 0.178   | 1.195 | 1.097-1.302 |
| 75-84                                              | 0.146   | 1.157 | 1.063-1.259 |
| > 84                                               | 0.080   | 1.083 | 0.995-1.179 |
| <i>Risk levels (Adjusted Morbidity Groups-GMA)</i> |         |       |             |
| Low risk                                           | 0.000   | 1.000 | —           |
| Intermediate risk                                  | 0.390   | 1.476 | 1.357-1.606 |
| High risk                                          | 0.678   | 1.970 | 1.814-2.140 |
| Very high risk                                     | 0.883   | 2.418 | 2.221-2.632 |
| <i>Years since HF diagnosis</i>                    |         |       |             |
| < 1                                                | 0.000   | 1.000 | —           |
| 1-2                                                | 0.223   | 1.250 | 1.215-1.286 |

| <b>CLINICALLY-RELATED READMISSION</b>         |          |           |              |
|-----------------------------------------------|----------|-----------|--------------|
| <b>Variable</b>                               | <b>β</b> | <b>HR</b> | <b>95%CI</b> |
| 3-5                                           | 0.274    | 1.315     | 1.279-1.351  |
| > 5                                           | 0.310    | 1.363     | 1.327-1.401  |
| <i>Number of previous hospital admissions</i> | 0.133    | 1.142     | 1.135-1.149  |
| <i>Area and period</i>                        |          |           |              |
| Rest of CatSalut 2015-2016                    | 0.000    | 1.000     | —            |
| Rest of CatSalut 2017                         | -0.131   | 0.877     | 0.854-0.901  |
| Rest of CatSalut 2018-2019                    | -0.172   | 0.842     | 0.822-0.862  |
| HUB-DELTA area 2015-2016                      | 0.171    | 1.186     | 1.119-1.257  |
| HUB-DELTA area 2017                           | 0.001    | 1.001     | 0.913-1.097  |
| HUB-DELTA area 2018-2019                      | -0.278   | 0.757     | 0.688-0.833  |

| HF READMISSION                                     |         |       |             |
|----------------------------------------------------|---------|-------|-------------|
| Variable                                           | $\beta$ | HR    | 95%CI       |
| <i>Individual annual income</i>                    |         |       |             |
| Medium or high SES                                 | 0.000   | 1.000 | —           |
| Low SES                                            | 0.113   | 1.119 | 1.082-1.158 |
| Very low SES                                       | 0.199   | 1.220 | 1.149-1.295 |
| <i>Sex</i>                                         |         |       |             |
| Male                                               | 0.000   | 1.000 | —           |
| Female                                             | 0.002   | 1.002 | 0.978-1.026 |
| <i>Age group, y</i>                                |         |       |             |
| 15-49                                              | 0.000   | 1.000 | —           |
| 50-64                                              | 0.091   | 1.096 | 0.978-1.227 |
| 65-74                                              | 0.162   | 1.175 | 1.054-1.311 |
| 75-84                                              | 0.268   | 1.307 | 1.173-1.456 |
| > 84                                               | 0.310   | 1.363 | 1.223-1.519 |
| <i>Risk levels (Adjusted Morbidity Groups-GMA)</i> |         |       |             |
| Low risk                                           | 0.000   | 1.000 | —           |
| Intermediate risk                                  | 0.497   | 1.644 | 1.457-1.855 |
| High risk                                          | 0.834   | 2.302 | 2.044-2.592 |
| Very high risk                                     | 1.031   | 2.803 | 2.485-3.163 |
| <i>Years since HF diagnosis</i>                    |         |       |             |
| < 1                                                | 0.000   | 1.000 | —           |
| 1-2                                                | 0.388   | 1.474 | 1.425-1.525 |

| <b>HF READMISION</b>                          |          |           |              |
|-----------------------------------------------|----------|-----------|--------------|
| <b>Variable</b>                               | <b>β</b> | <b>HR</b> | <b>95%CI</b> |
| 3-5                                           | 0.467    | 1.595     | 1.544-1.648  |
| >5                                            | 0.539    | 1.714     | 1.660-1.770  |
| <i>Number of previous hospital admissions</i> | 0.147    | 1.158     | 1.150-1.166  |
| <i>Area and period</i>                        |          |           |              |
| Rest of CatSalut 2015-2016                    | 0.000    | 1.000     | —            |
| Rest of CatSalut 2017                         | -0.157   | 0.855     | 0.829-0.882  |
| Rest of CatSalut 2018-2019                    | -0.209   | 0.812     | 0.789-0.835  |
| HUB-DELTA area 2015-2016                      | 0.267    | 1.306     | 1.223-1.393  |
| HUB-DELTA area 2017                           | 0.063    | 1.065     | 0.958-1.183  |
| HUB-DELTA area 2018-2019                      | -0.367   | 0.693     | 0.616-0.780  |

**Table 6 of the supplementary data.** Multivariate (adjusted) Cox proportional hazards analyses exploring the effect of the interaction term health care area (HUB-DELTA area vs rest of CatSalut) by SES (low or very low vs Medium or high) on all outcomes across the predefined study periods.

|                                 |                                                                |             |                   |
|---------------------------------|----------------------------------------------------------------|-------------|-------------------|
|                                 | Interaction term [health care area*SES strata] for each period |             |                   |
| All-cause death                 |                                                                |             |                   |
| Period                          | HR                                                             | 95%CI       | P for interaction |
| 2015-2016                       | 1.015                                                          | 0.851-1.211 | .864              |
| 2017                            | 0.768                                                          | 0.572-1.032 | .080              |
| 2018-2019                       | 1.025                                                          | 0.731-1.439 | .884              |
| Clinically-related readmissions |                                                                |             |                   |
| Period                          | HR                                                             | 95%CI       | P for interaction |
| 2015-2016                       | 0.914                                                          | 0.781-1.069 | .259              |
| 2017                            | 0.943                                                          | 0.722-1.232 | .667              |
| 2018-2019                       | 1.049                                                          | 0.806-1.366 | .721              |
| HF readmissions                 |                                                                |             |                   |
| Period                          | HR                                                             | 95%CI       | P for interaction |
| 2015-2016                       | 0.868                                                          | 0.727-1.037 | .119              |
| 2017                            | 1.148                                                          | 0.819-1.609 | .424              |
| 2018-2019                       | 1.139                                                          | 0.808-1.605 | .459              |

**FIGURES OF THE SUPPLEMENTARY DATA**

**Figure 1 of the supplementary data.** Flow diagram of patients of the study population included in the present analysis.

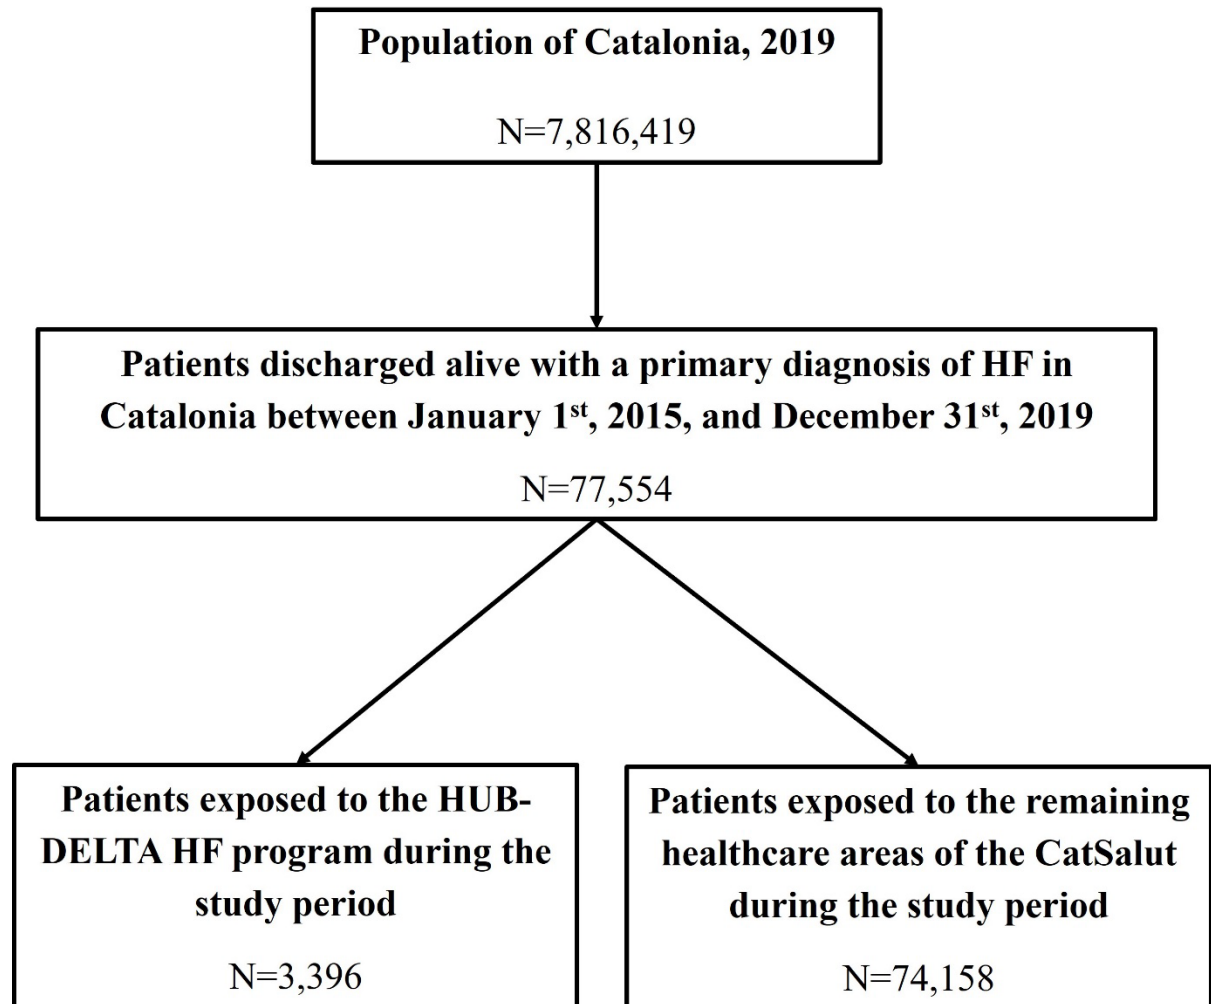

**Figure 2 of the supplementary data.** Survival curves estimated from multivariate (adjusted) Cox models evaluating the impact on the adjusted probability of all-cause death according to health care setting (HUB-DELTA area vs the rest of CatSalut) across predefined periods: 2015 to 2016 (panel A), 2017 (panel B), and 2018 to 2019 (panel C) in the whole study population.

**A**

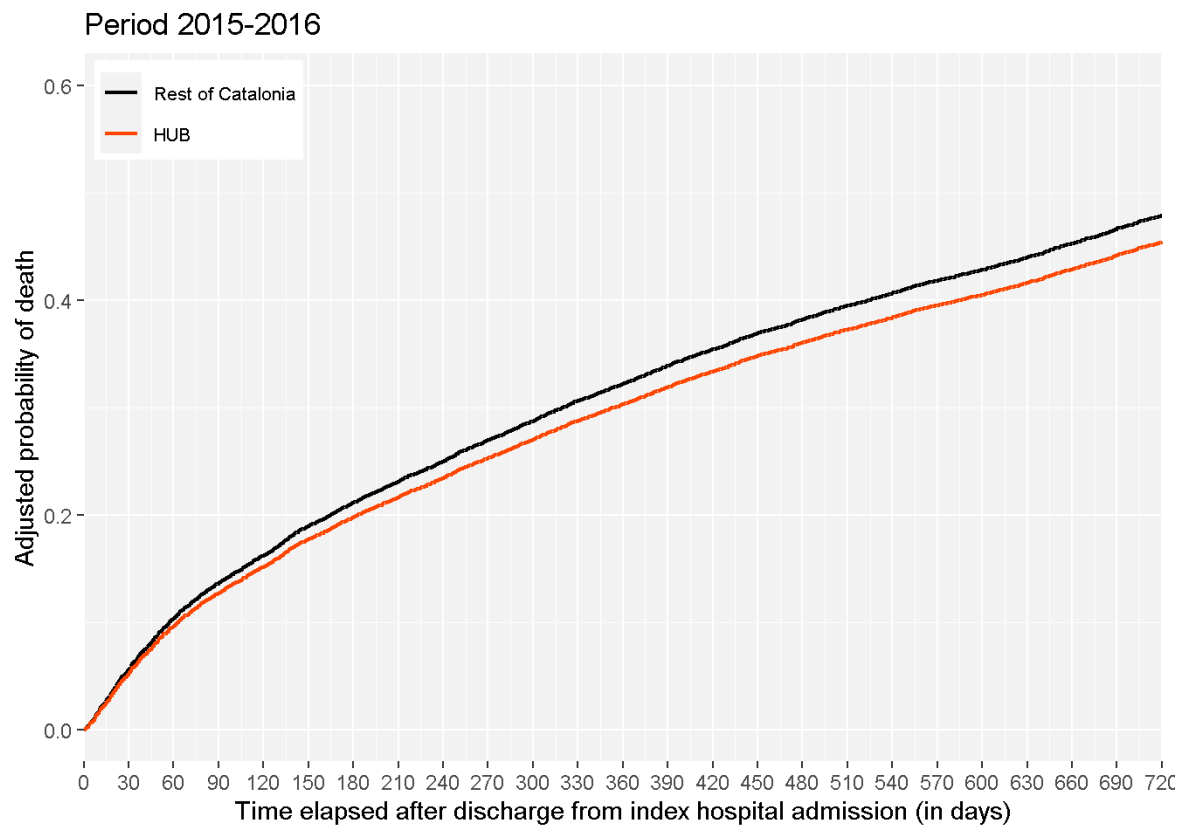

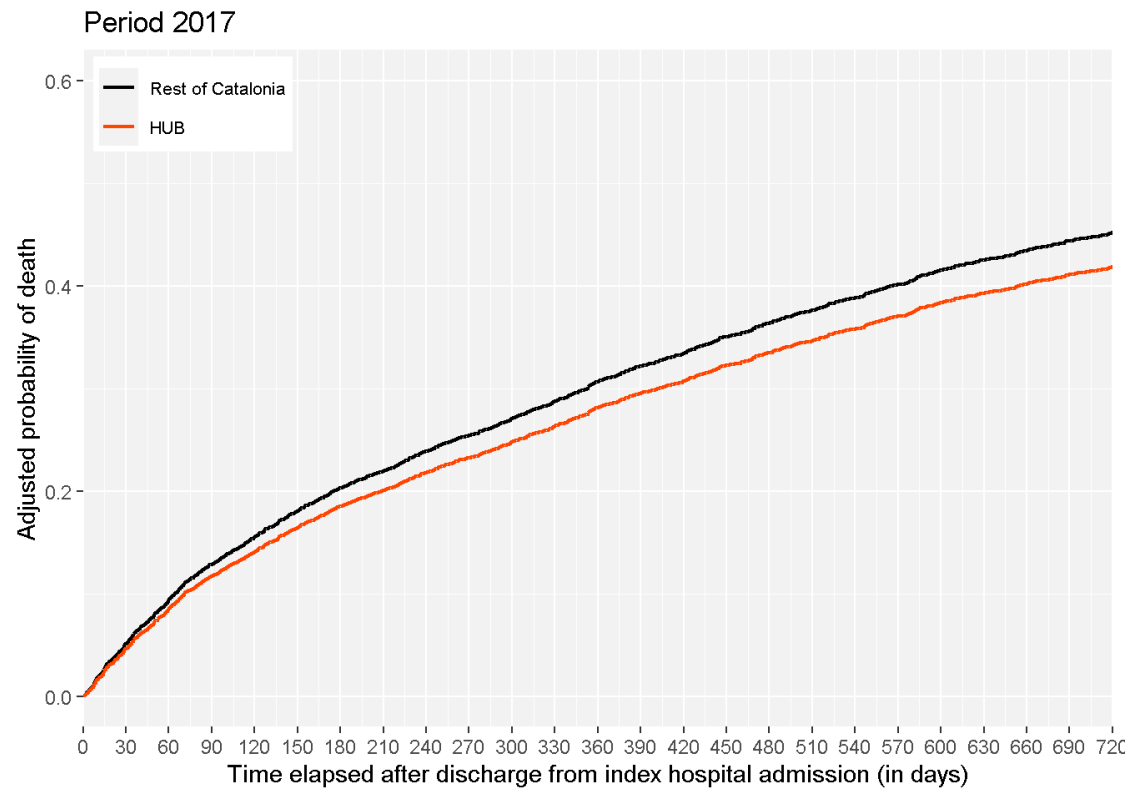

C

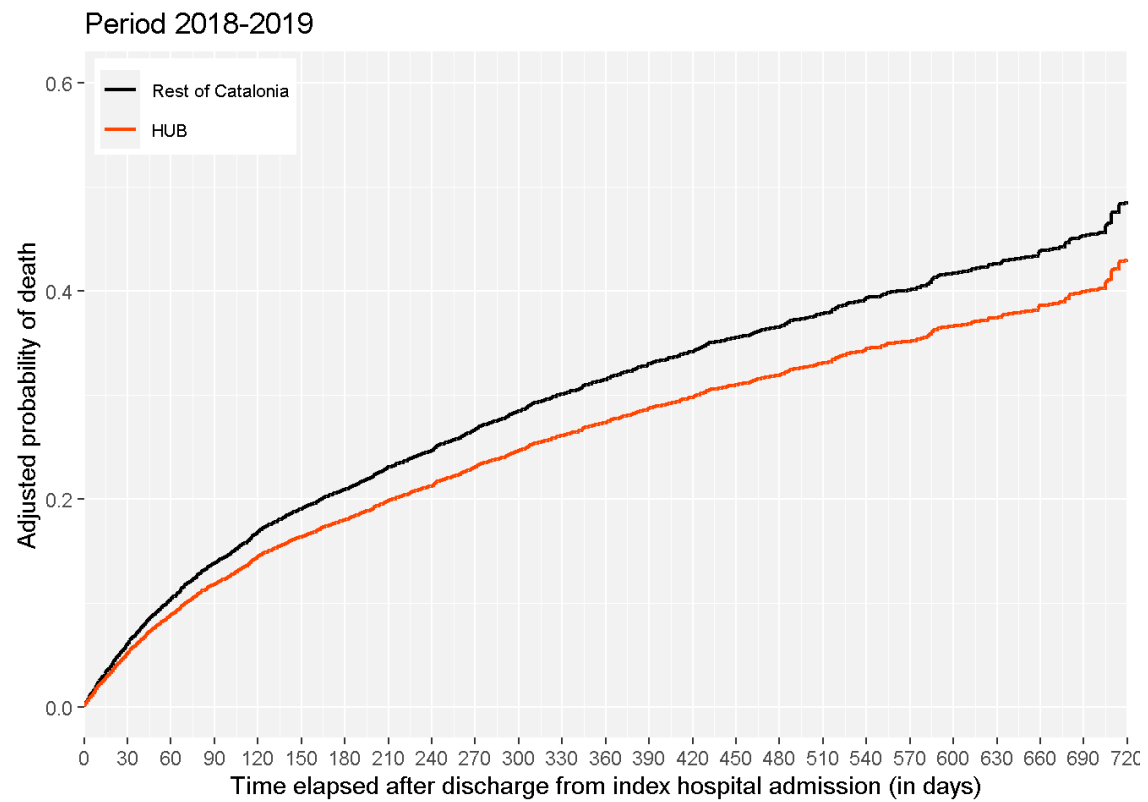



**Figure 3 of the supplementary data.** Survival curves estimated from multivariate (adjusted) Cox models evaluating the impact on adjusted probability of clinically-related readmission according to health care setting (HUB-DELTA area vs the rest of CatSalut) across predefined periods: 2015 to 2016 (panel A), 2017 (panel B), and 2018 to 2019 (panel C) in the whole study population.

**A**

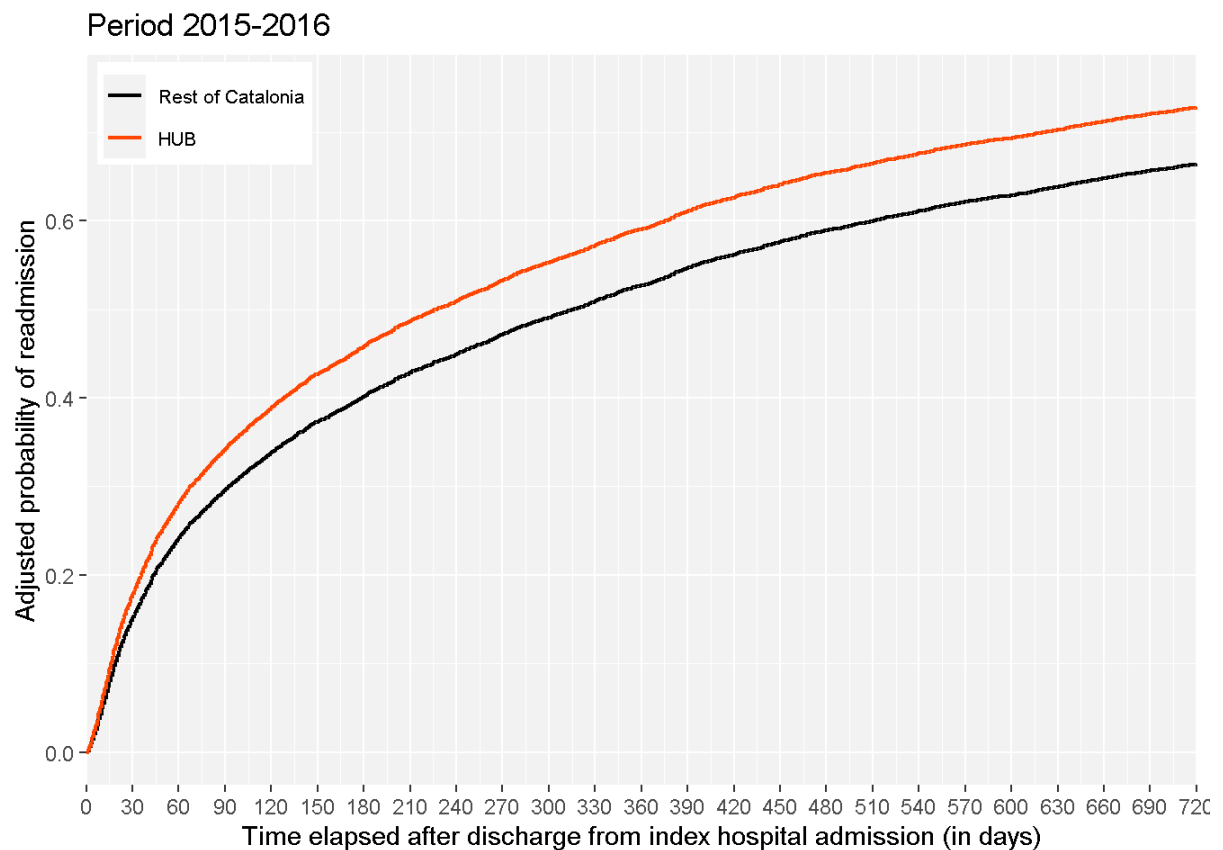

B

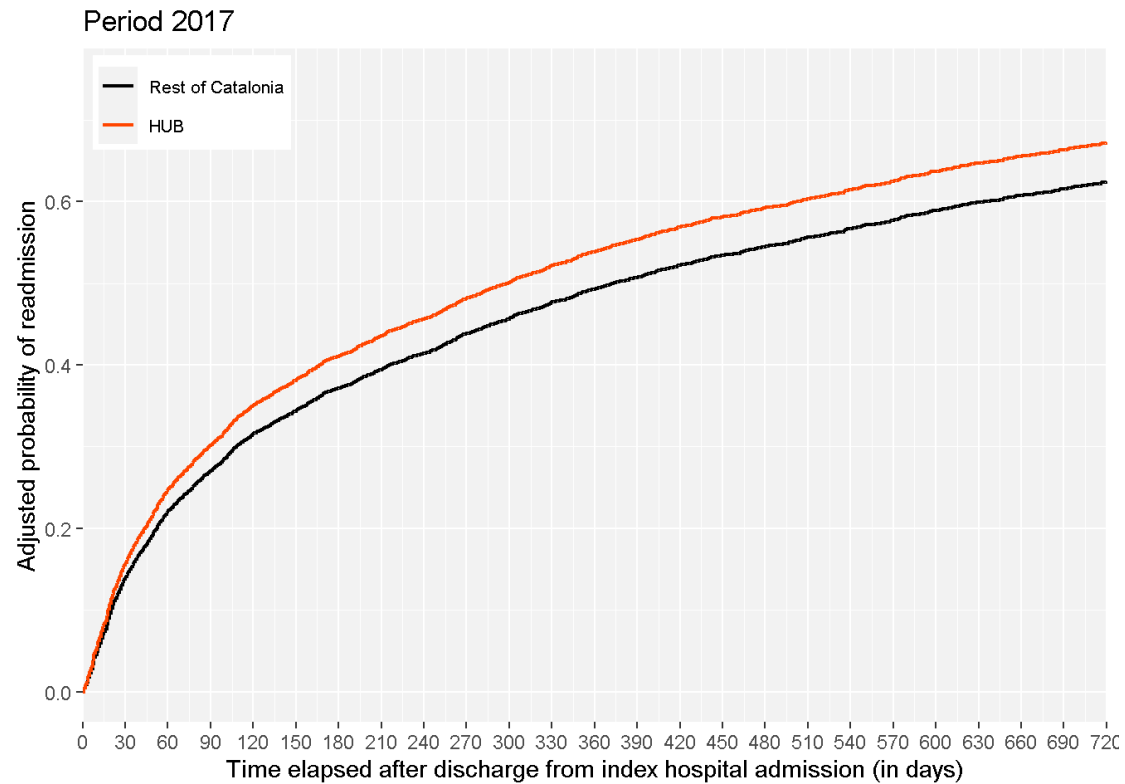

C

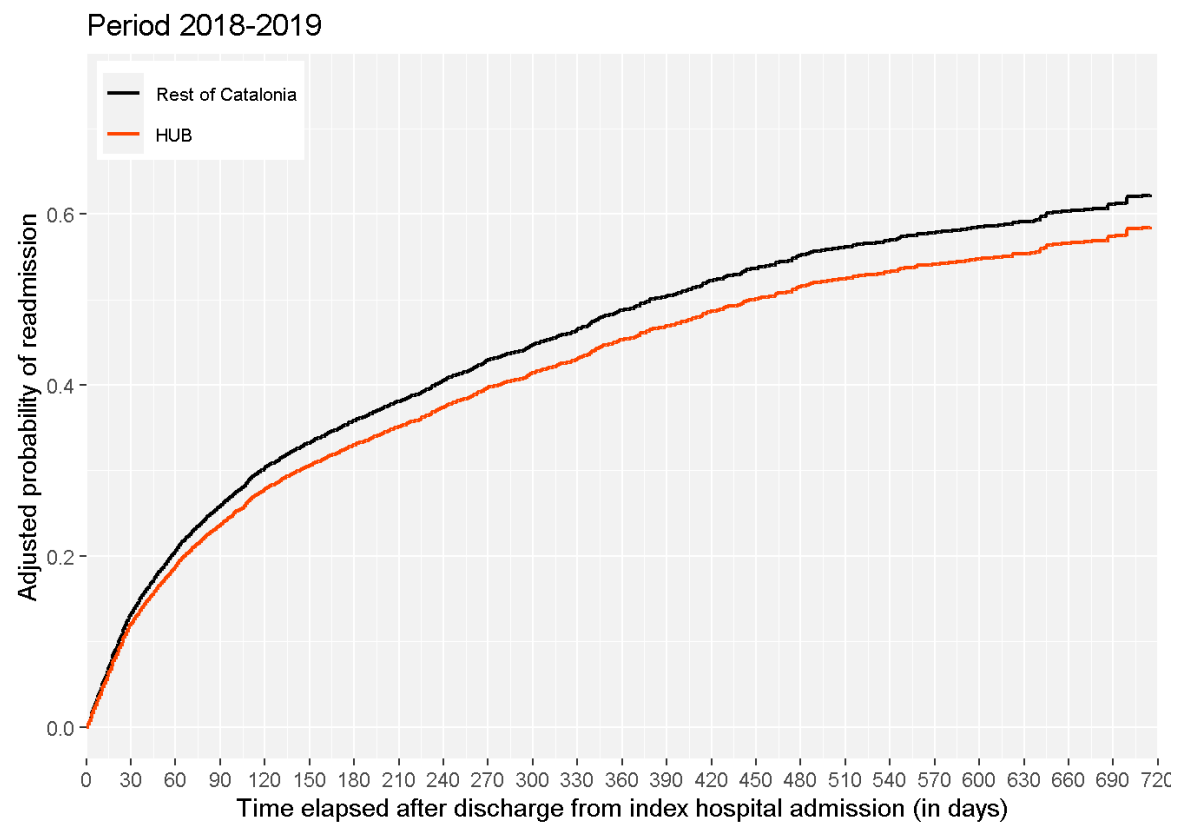

**Figure 4 of the supplementary data.** Survival curves estimated from multivariate (adjusted) Cox models evaluating the impact on adjusted probability of HF readmission according to health care setting (HUB-DELTA area vs the rest of CatSalut) across predefined periods: 2015 to 2016 (panel A), 2017 (panel B) and 2018 to 2019 (panel C) in the whole studied population.

**A**

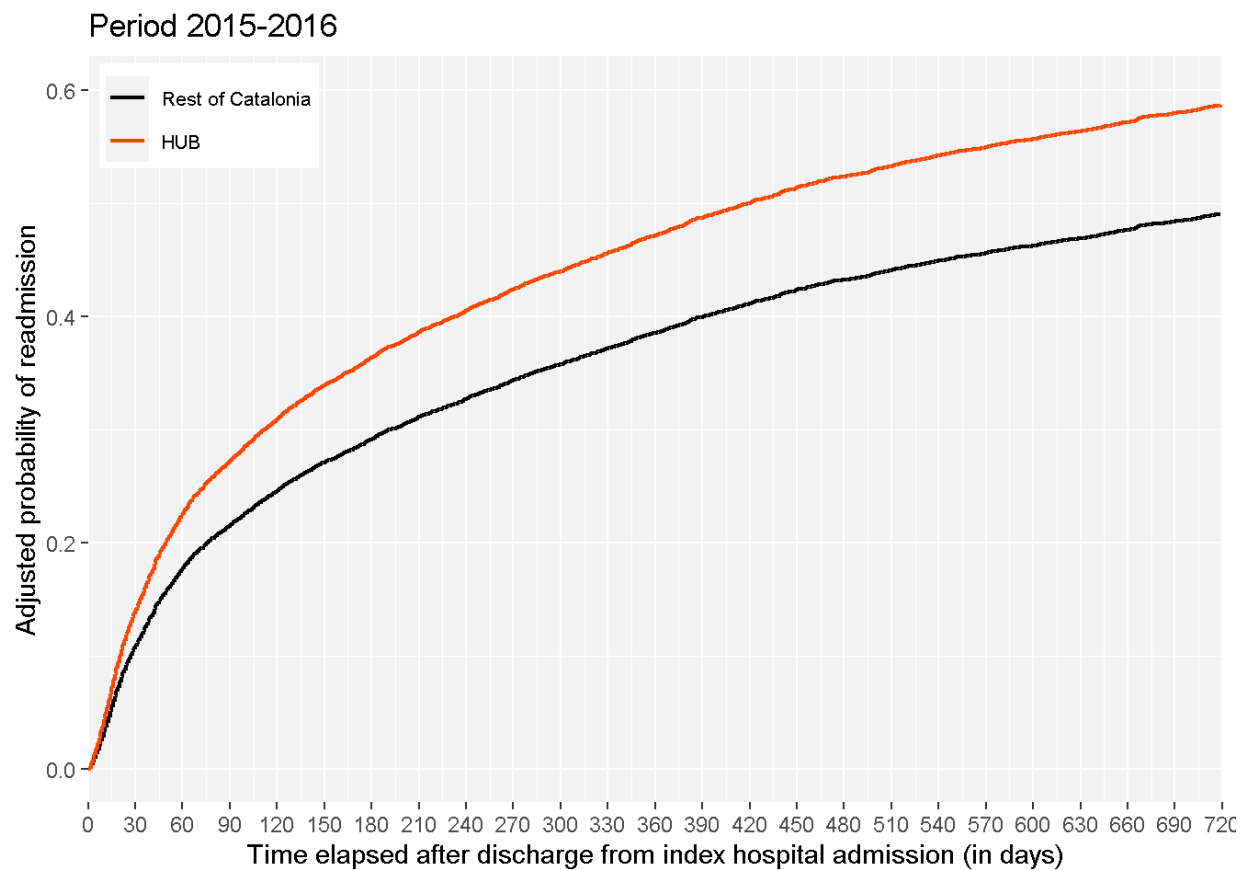

B

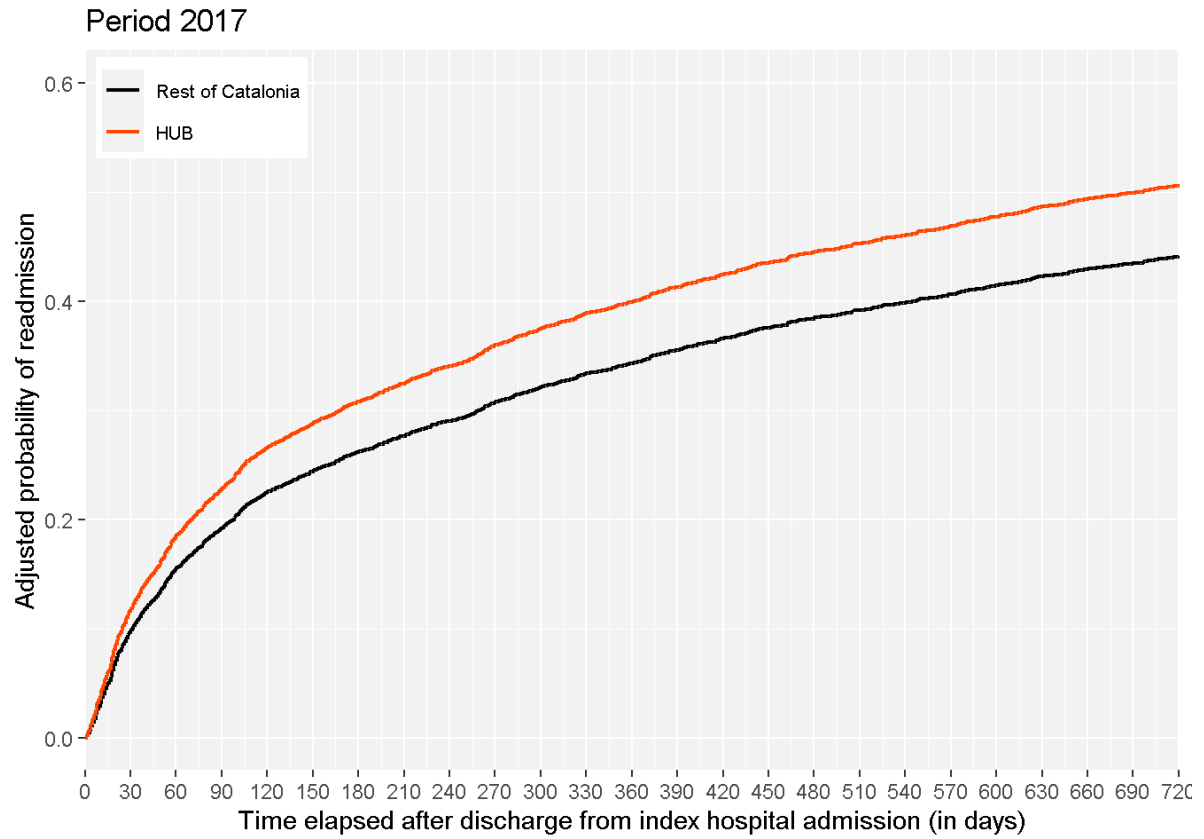

C

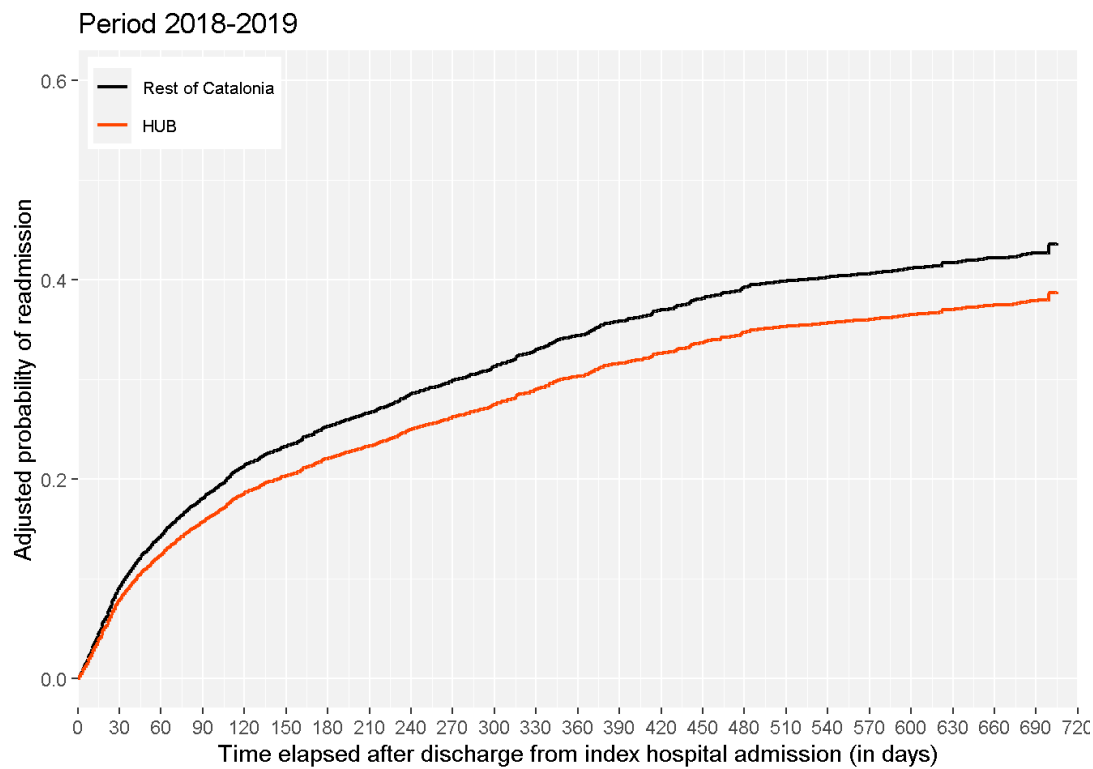

**Figure 5 of the supplementary data.** Survival curves estimated from multivariate (adjusted) Cox models evaluating the impact on adjusted probability of clinically-related readmission according to health care setting (HUB-DELTA area vs the rest of CatSalut) across predefined periods: 2015 to 2016 (panel A), 2017 (panel B), and 2018 to 2019 (panel C) in patients with medium or high SES.

**A**

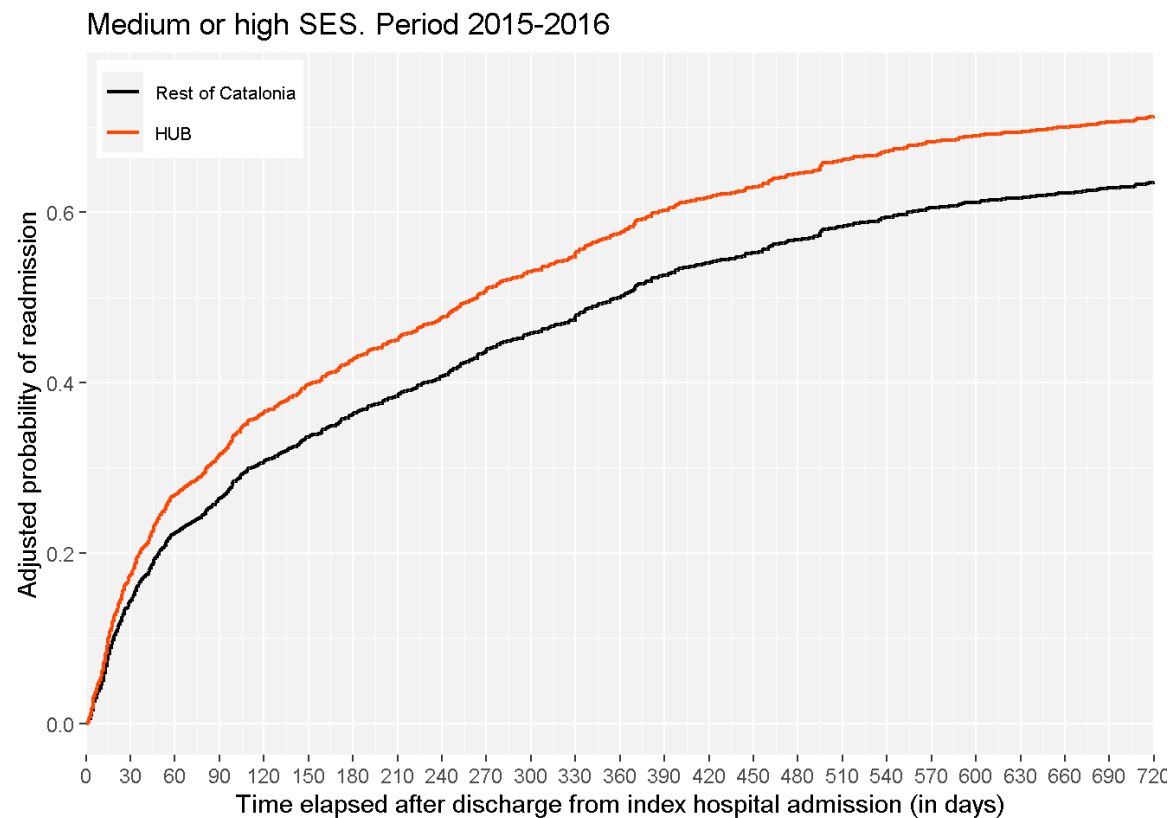

B

Medium or high SES. Period 2017

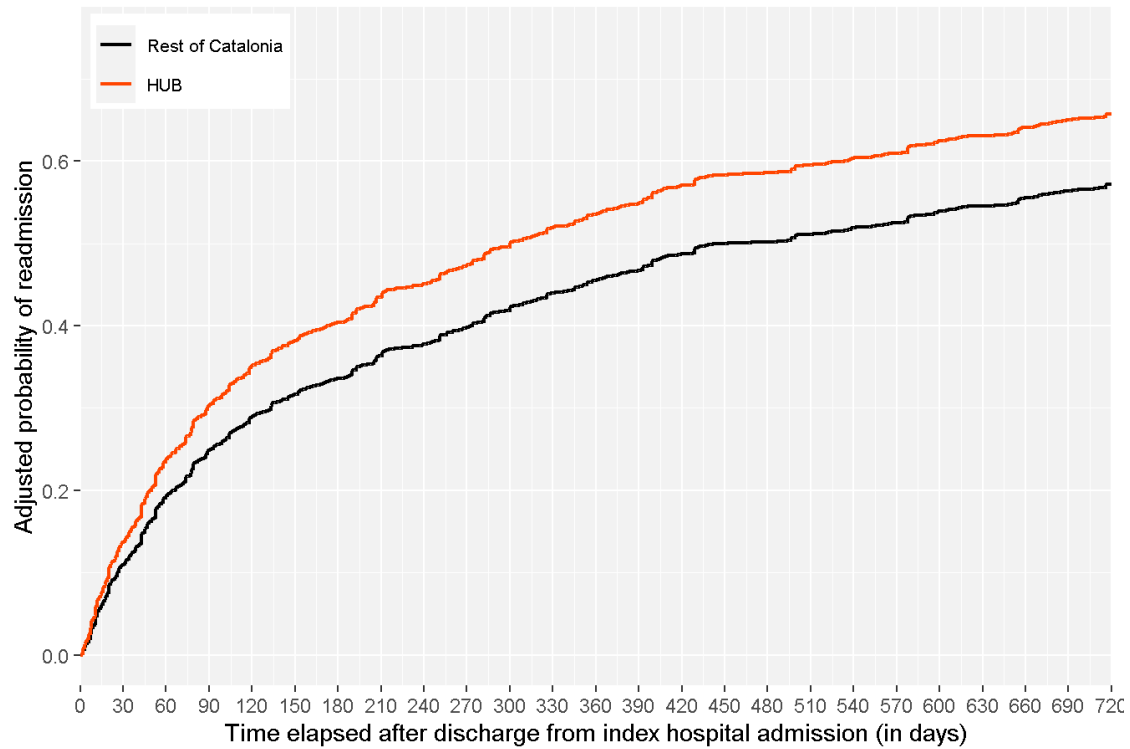

C

Medium or high SES. Period 2018-2019

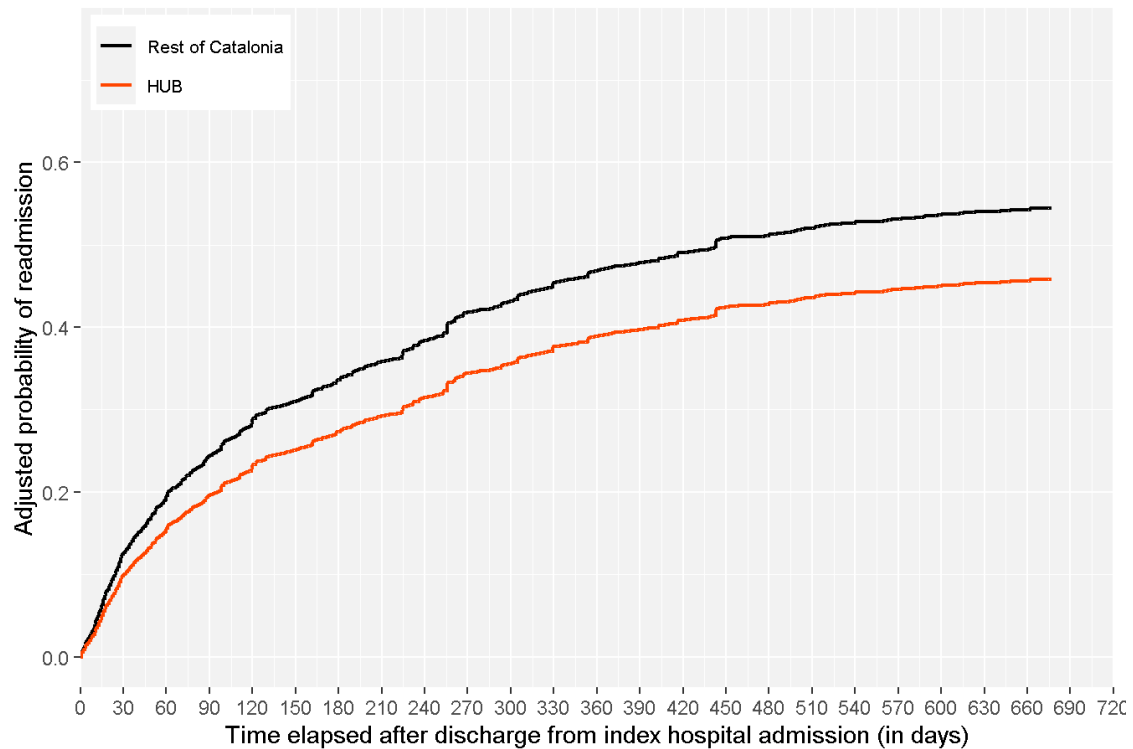

**Figure 6 of the supplementary data.** Survival curves estimated from multivariate (adjusted) Cox models evaluating the impact on adjusted probability of clinically-related readmission according to health care setting (HUB-DELTA area vs the rest of CatSalut) across predefined periods: 2015 to 2016 (panel A), 2017 (panel B), and 2018 to 2019 (panel C) in patients with low or very low SES.

A

Low or very low SES. Period 2015-2016

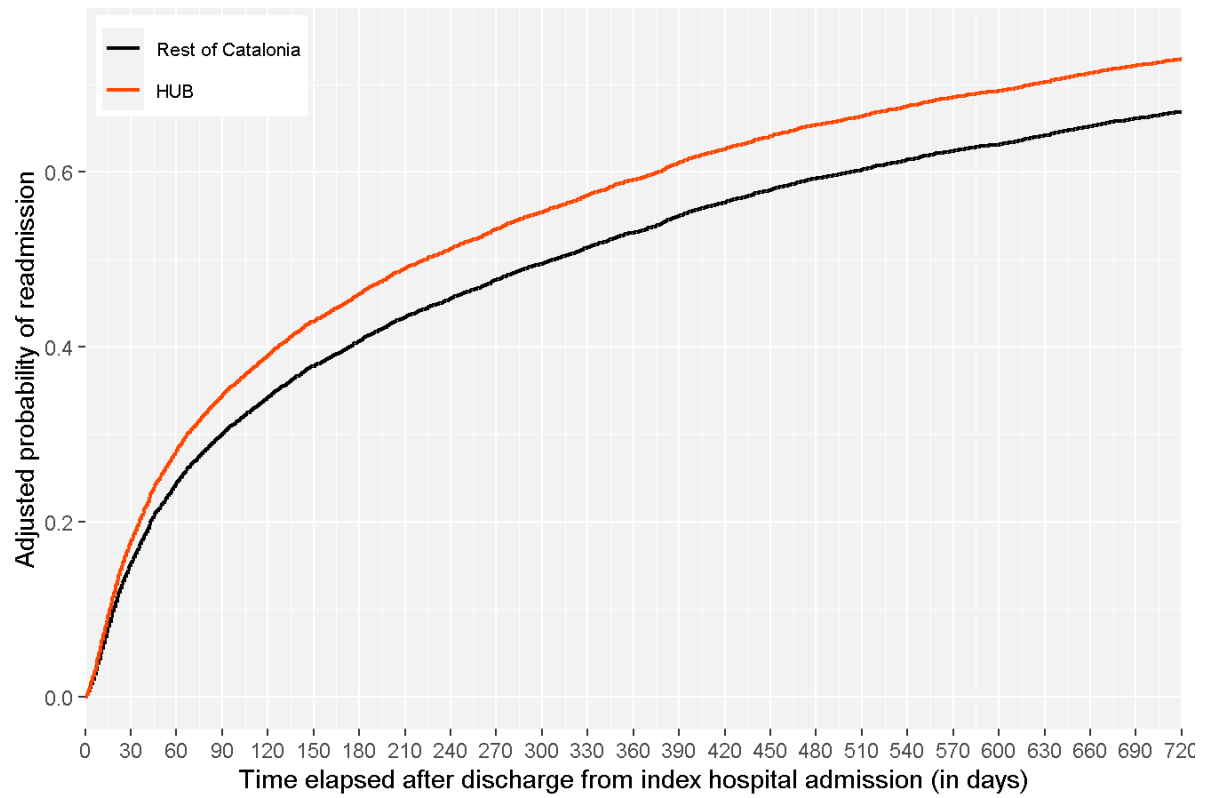



**B**

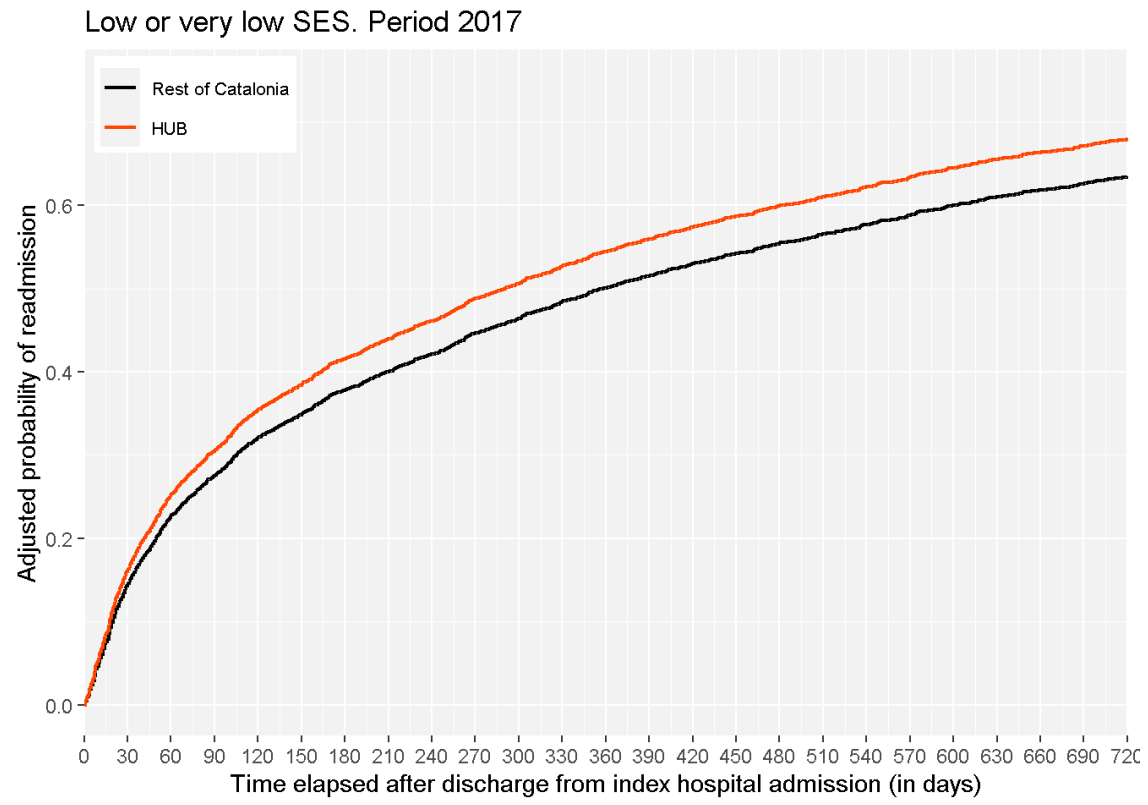

**C**

Low or very low SES. Period 2018-2019

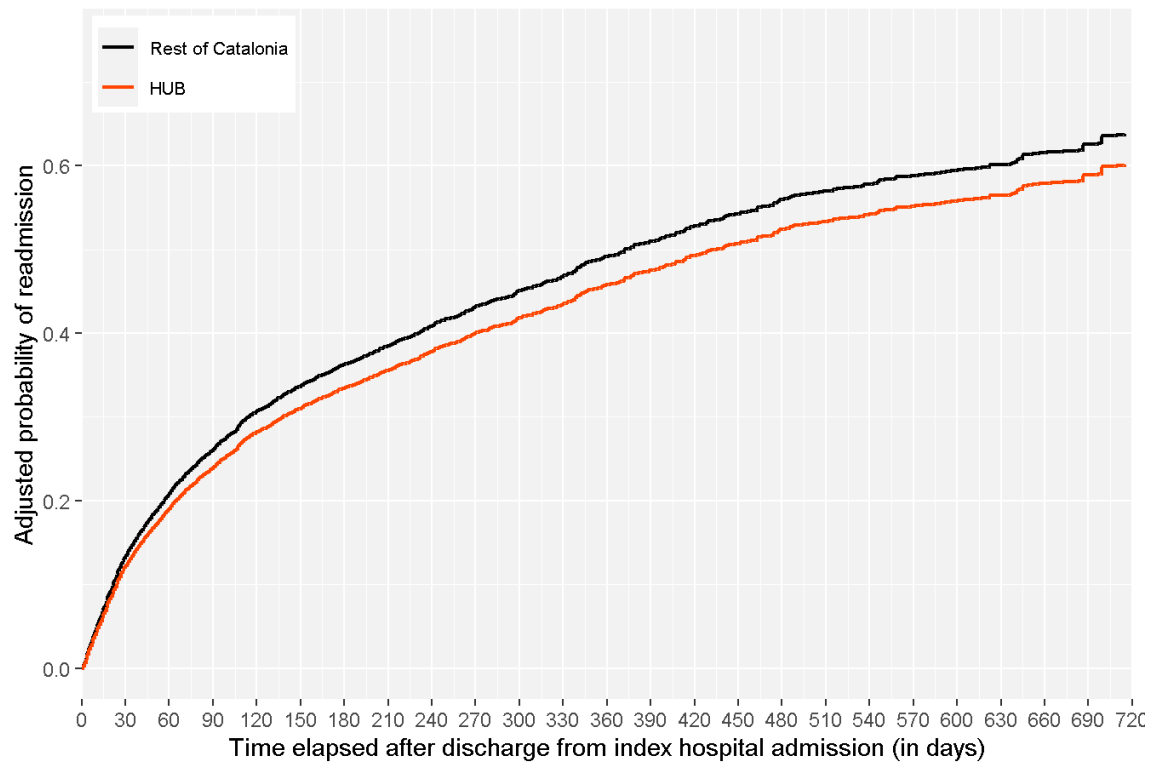

**Figure 7 of the supplementary data.** Survival curves estimated from multivariate (adjusted) Cox models evaluating the impact on adjusted probability of HF readmission according to health care setting (HUB-DELTA area vs rest of CatSalut) across predefined periods: 2015 to 2016 (panel A), 2017 (panel B), and 2018 to 2019 (panel C) in patients with medium or high SES.

**A**

Medium or high SES. Period 2015-2016

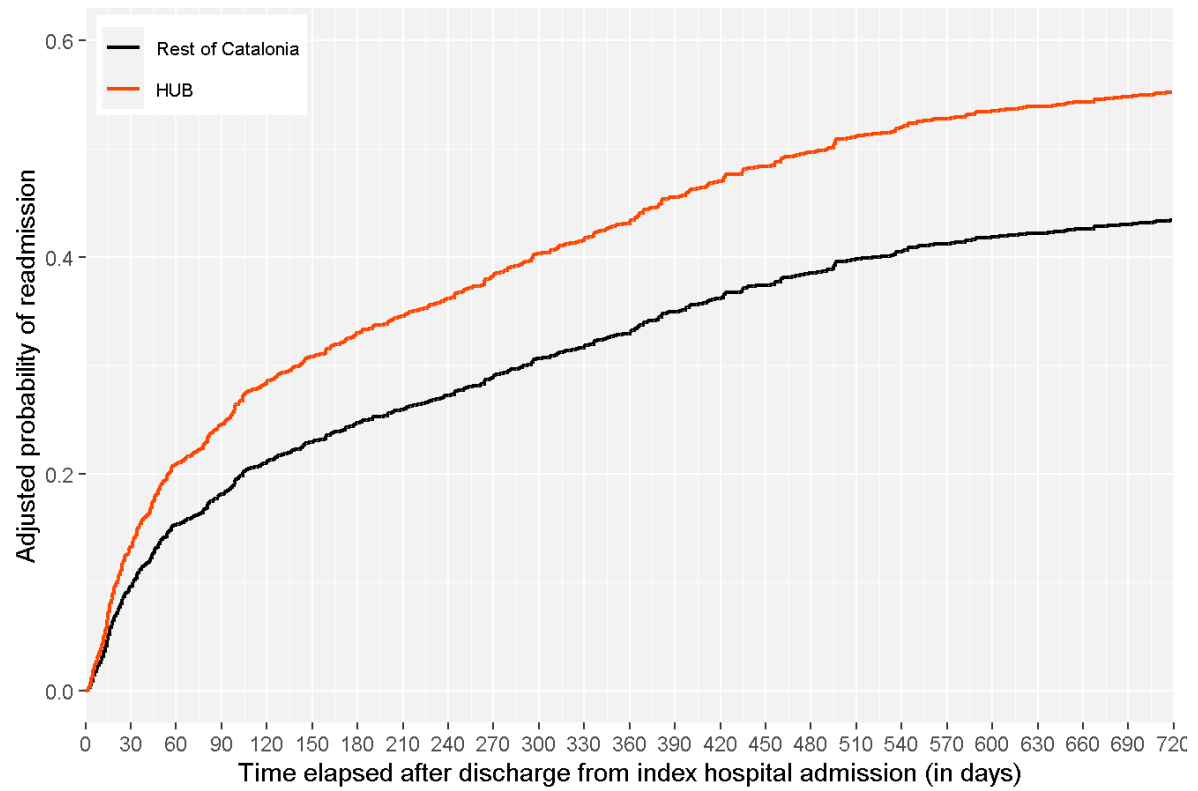

**B**

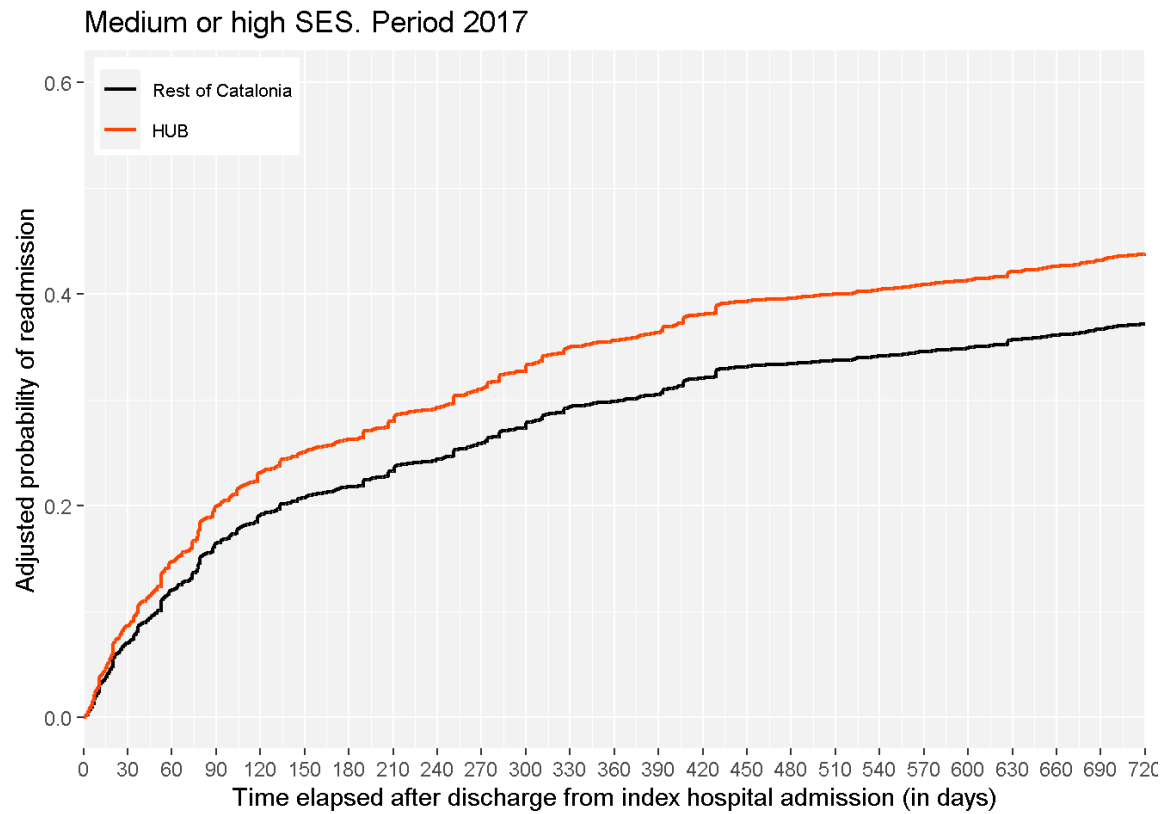

**C**

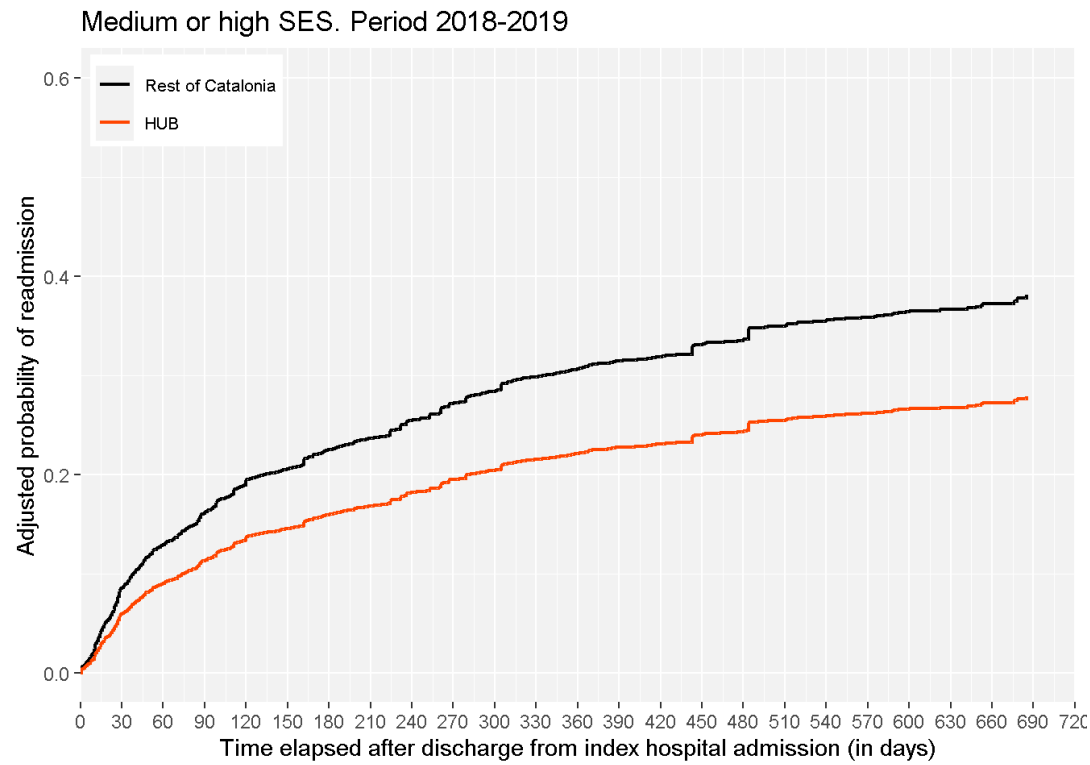

**Figure 8 of the supplementary data.** Survival curves estimated from multivariate (adjusted) Cox models evaluating the impact on the adjusted probability of HF readmission according to health care setting (HUB-DELTA area vs rest of CatSalut) across predefined periods: 2015 to 2016 (panel A), 2017 (panel B), and 2018 to 2019 (panel C) in patients with low or very low SES.

A

Low or very low SES. Period 2015-2016

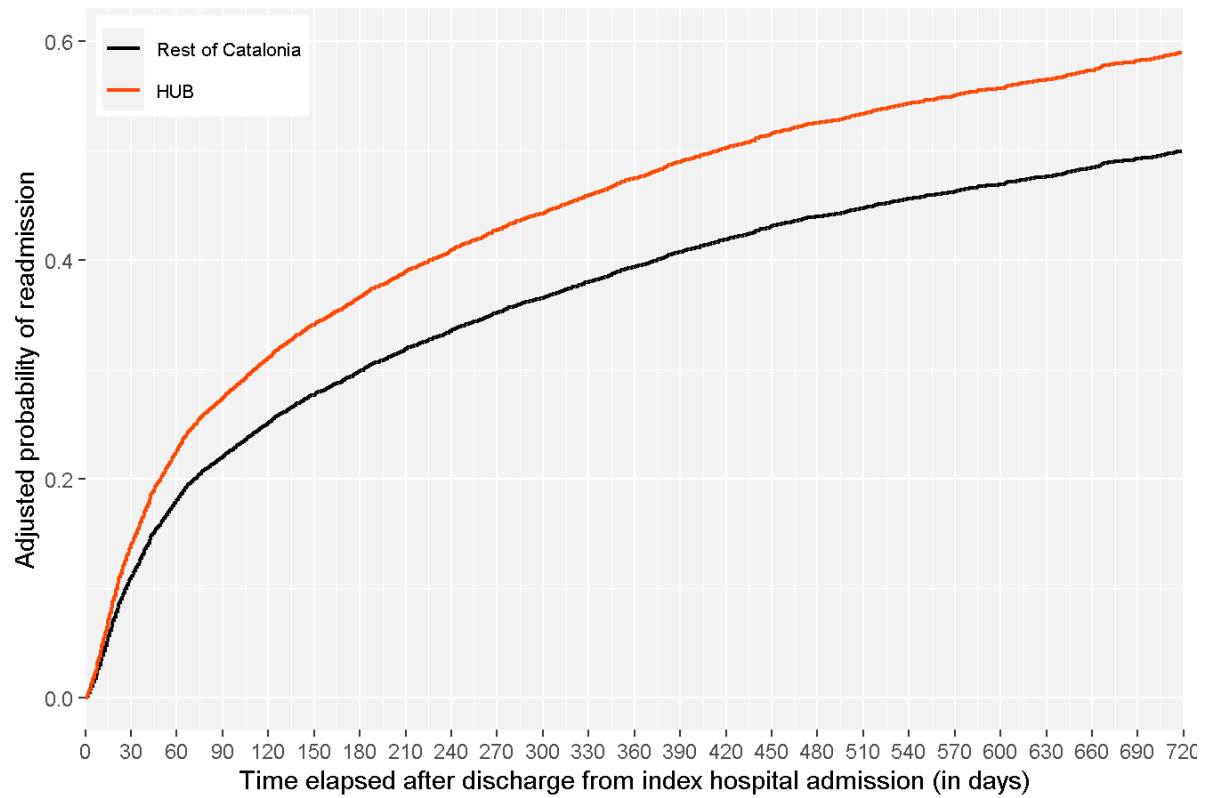

**B**

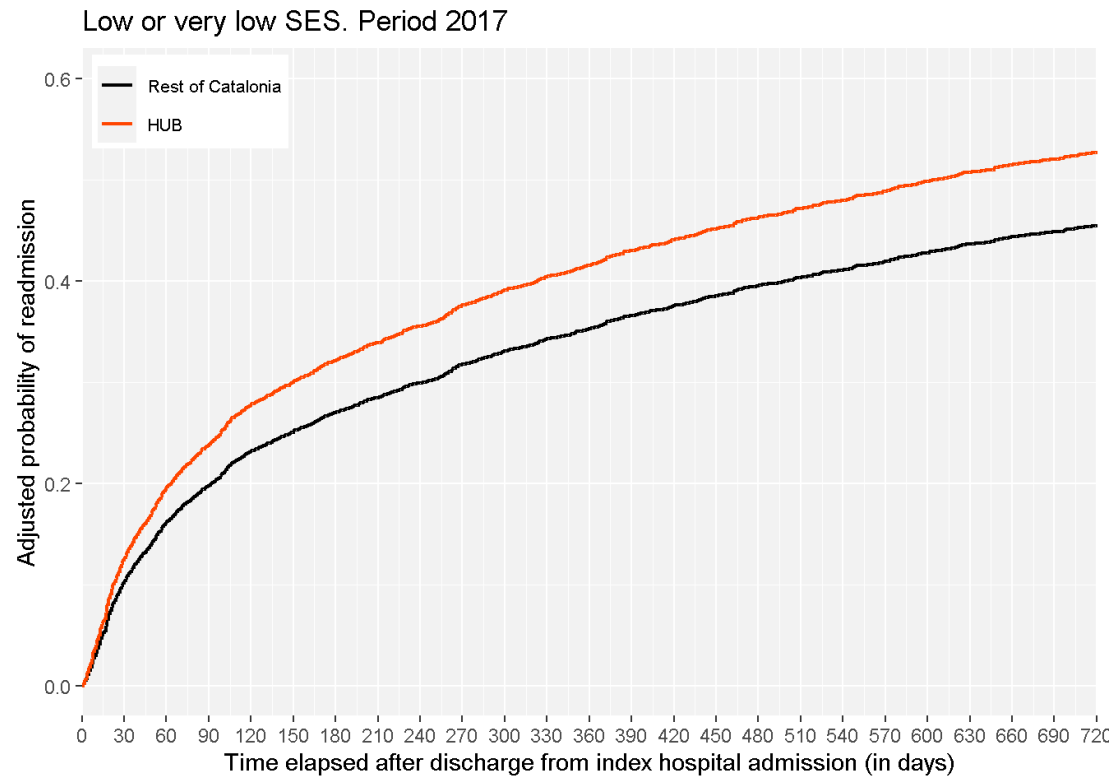

**C**

Low or very low SES. Period 2018-2019

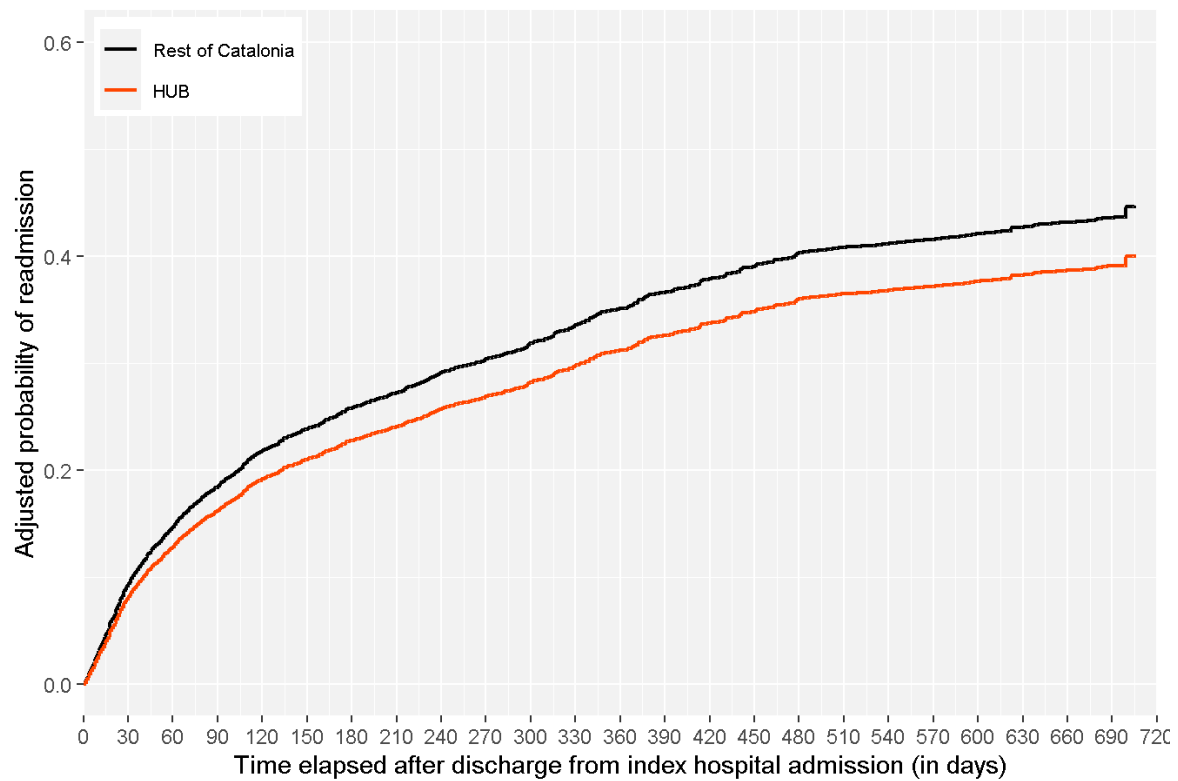

**Figure 9 of the supplementary data.** Survival curves estimated from multivariate (adjusted) Cox models evaluating the impact on adjusted probability of all-cause death according to health care setting (HUB-DELTA area vs rest of CatSalut) across predefined periods: 2015 to 2016 (panel A), 2017 (panel B), and 2018 to 2019 (panel C) in patients with medium or high SES.

A



Medium or high SES. Period 2015-2016

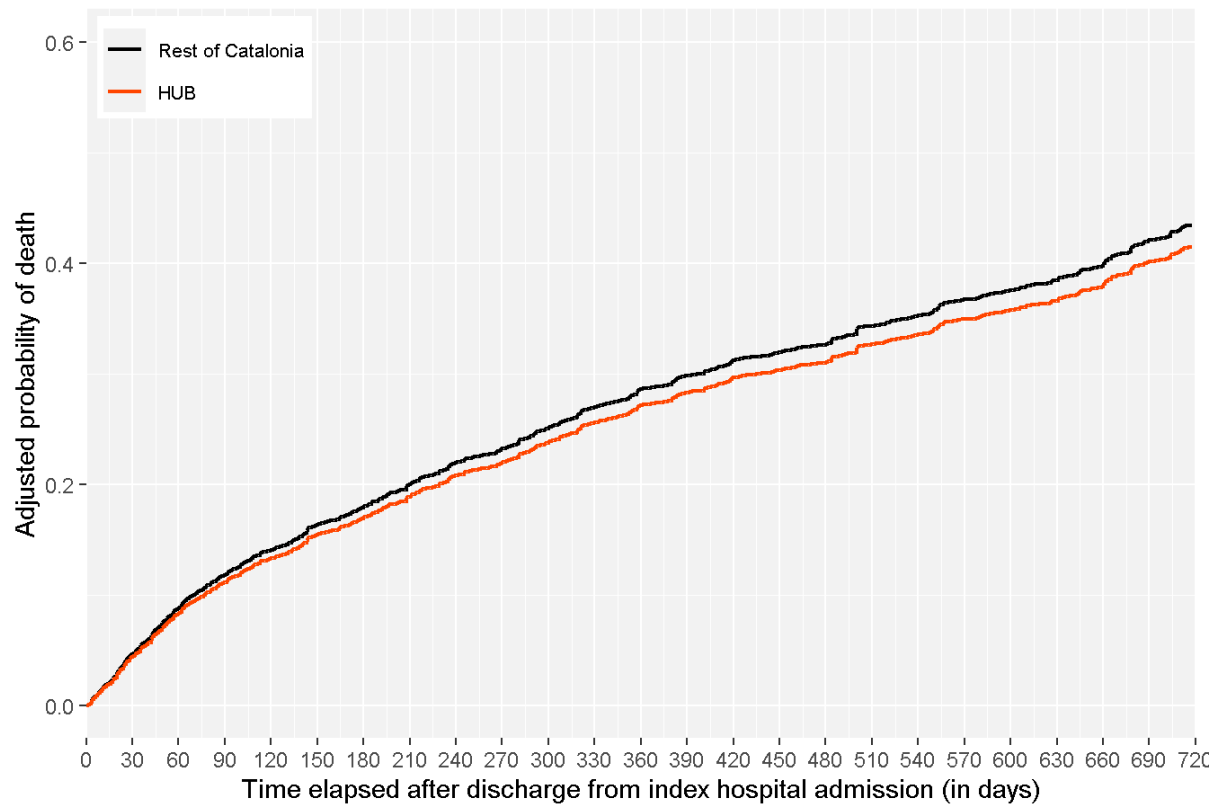

B

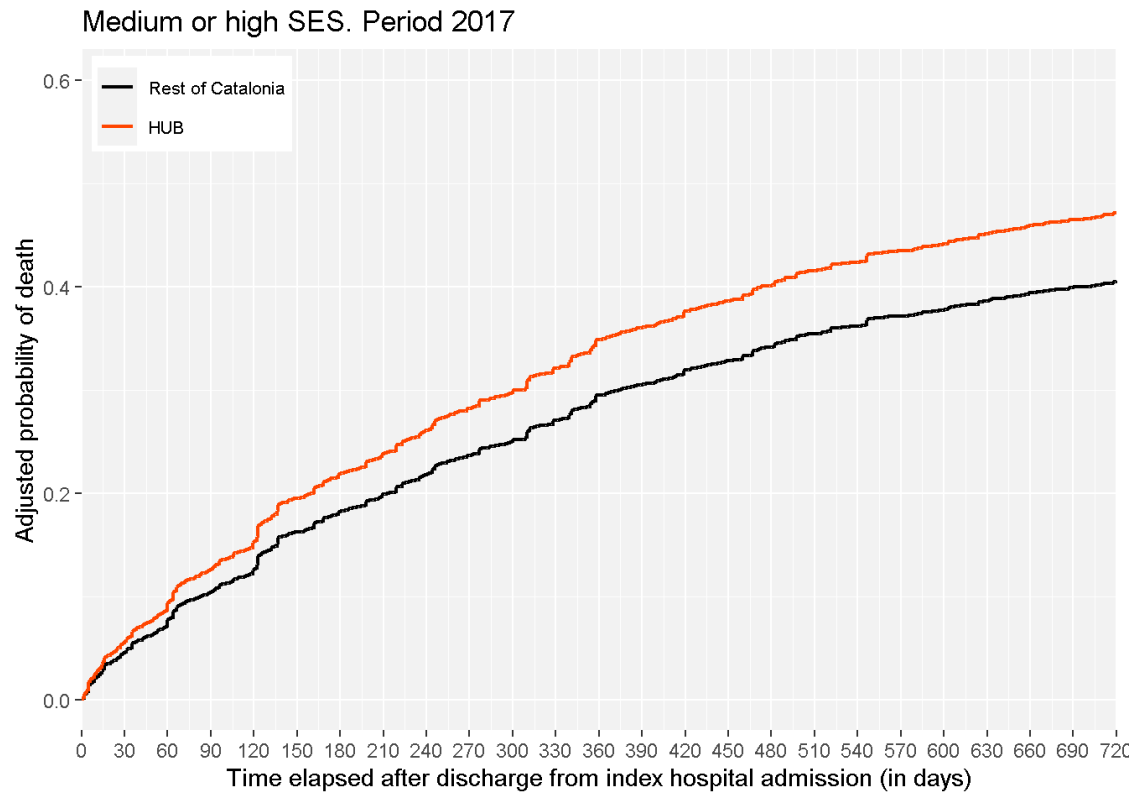

C

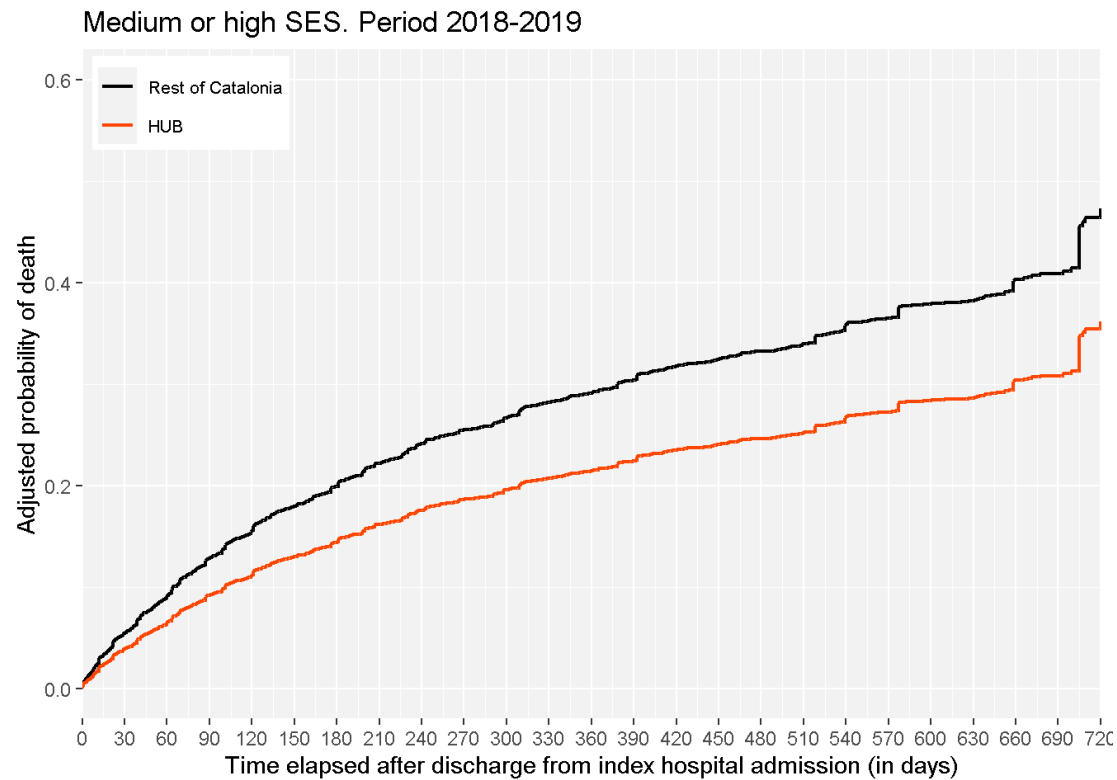

**Figure 10 of the supplementary data.** Survival curves estimated from multivariate (adjusted) Cox models evaluating the impact on adjusted probability of all-cause death according to health care setting (HUB-DELTA area vs rest of CatSalut) across predefined periods: 2015 to 2016 (panel A), 2017 (panel B), and 2018 to 2019 (panel C) in patients with low or very low SES.

**A**

Low or very low SES. Period 2015-2016

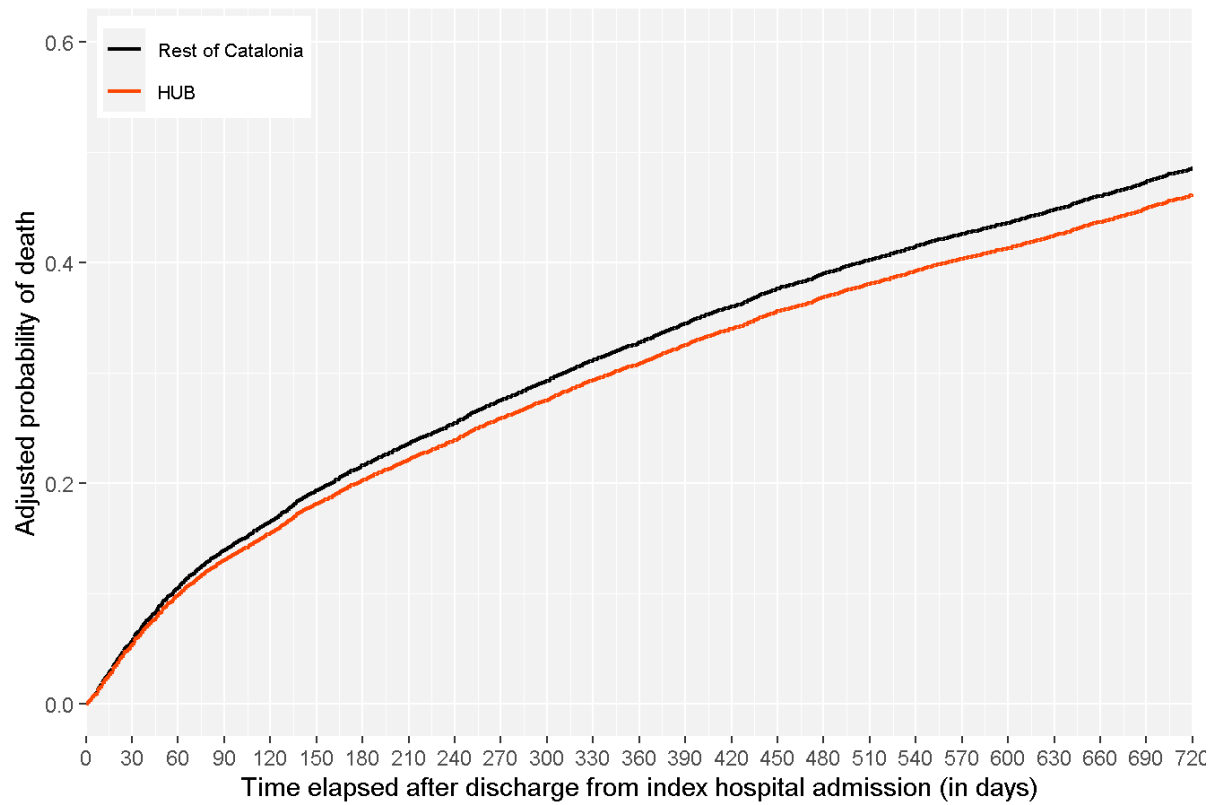

B

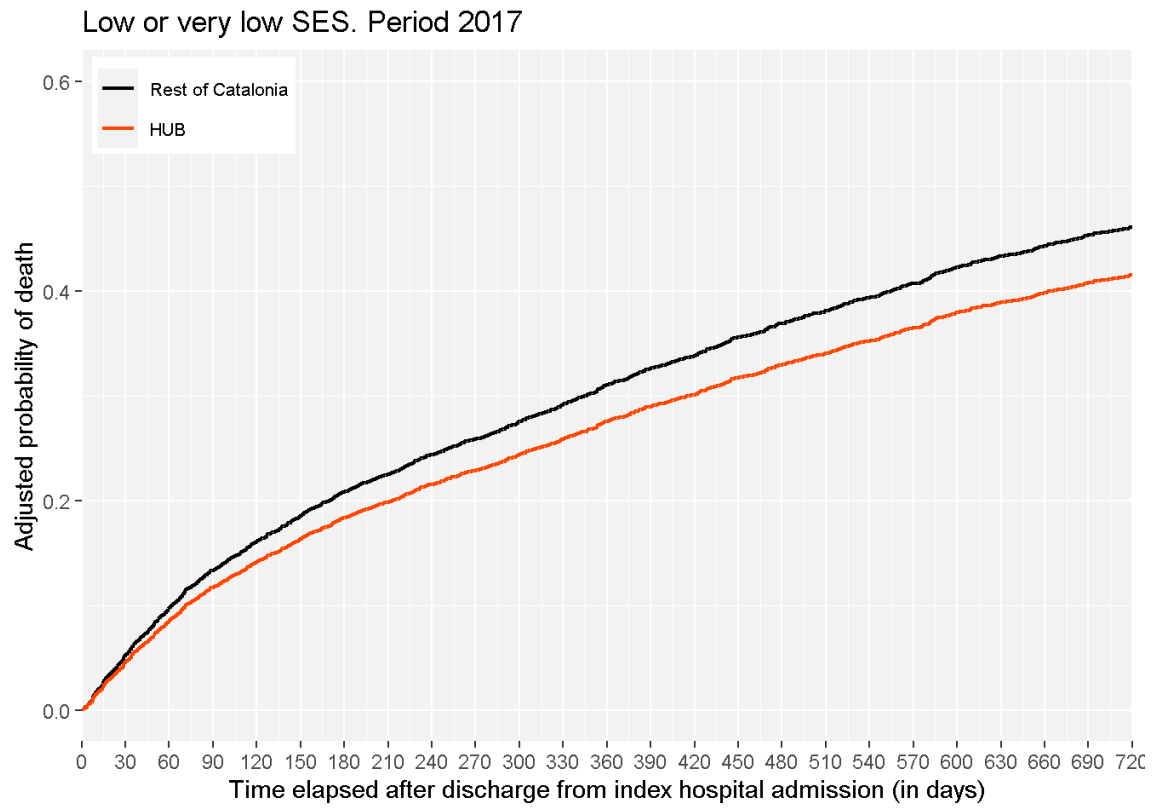

C

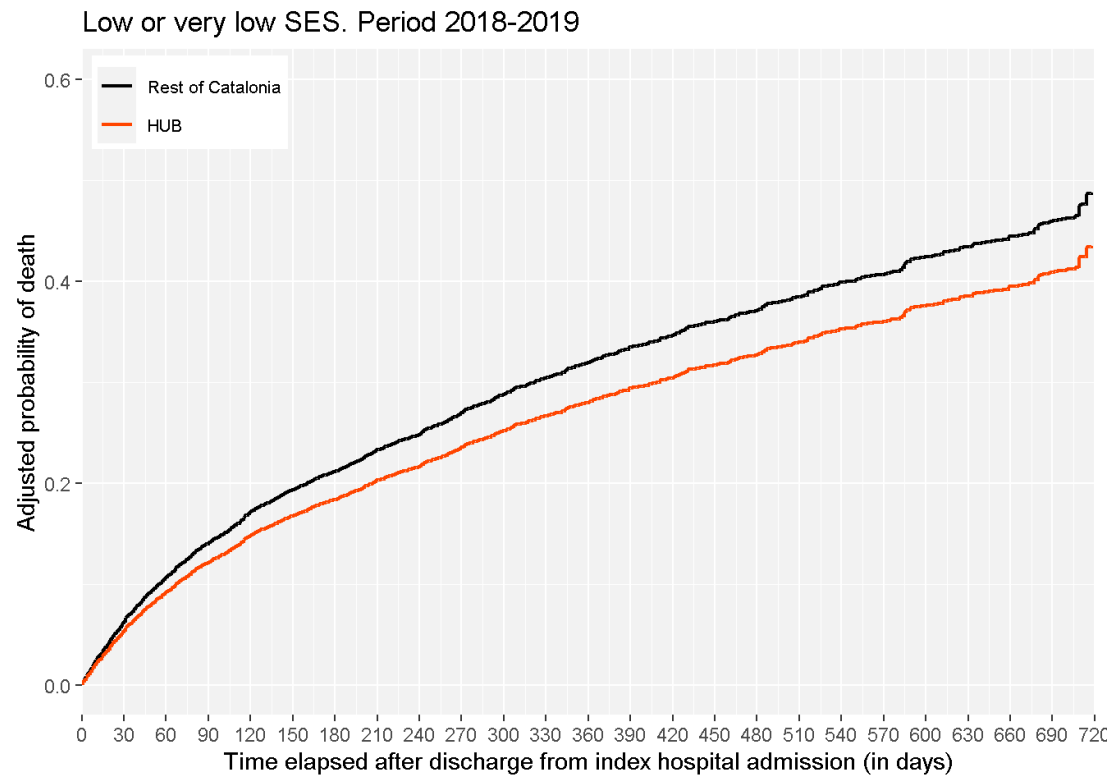

#### REFERENCES OF THE SUPPLEMENTARY DATA

1. Comín-Colet J, Enjuanes C, Lupón J, Cainzos-Achirica M, Badosa N, Verdú JM. Transitions of Care Between Acute and Chronic Heart Failure: Critical Steps in the Design of a Multidisciplinary Care Model for the Prevention of Repeat Hospital Admissions. *Revista Española de Cardiología (English Edition)*. 2016;(x):1-11. doi:10.1016/j.rec.2016.05.001
2. Comín-Colet J, Verdú-Rotellar JM, Vela E, et al. Efficacy of an integrated hospital-primary care program for heart failure: a population-based analysis of 56,742 patients. Published online April 2014. doi:10.1016/j.rec.2013.12.005
3. Jiménez-Marrero S, Yun S, Cainzos-Achirica M, et al. Impact of telemedicine on the clinical outcomes and healthcare costs of patients with chronic heart failure and mid-range or preserved ejection fraction managed in a multidisciplinary chronic heart failure programme:

- A sub-analysis of the iCOR randomized . *J Telemed Telecare.* 2020;26(1-2). doi:10.1177/1357633X18796439
4. Comín-Colet J, Enjuanes C, Verdú-Rotellar JM, et al. Impact on clinical events and healthcare costs of adding telemedicine to multidisciplinary disease management programmes for heart failure: Results of a randomized controlled trial. *J Telemed Telecare.* 2016;22(5):282-295. doi:10.1177/1357633X15600583
  5. Yun S, Enjuanes C, Calero-Molina E, et al. Effectiveness of telemedicine in patients with heart failure according to frailty phenotypes: Insights from the iCOR randomised controlled trial. *Eur J Intern Med.* 2022;96:49-59. doi:10.1016/J.EJIM.2021.09.021
  6. Pacho C, Domingo M, N??ez R, et al. Early Postdischarge STOP-HF-Clinic Reduces 30-day Readmissions in Old and Frail Patients With Heart Failure. *Rev Esp Cardiol.* 2017;70(8):631-638. doi:10.1016/j.recesp.2016.12.026
  7. Albert NM, Barnason S, Deswal A, et al. Transitions of care in heart failure: A scientific statement from the American heart association. *Circ Heart Fail.* 2015;8(2):384-409. doi:10.1161/HHF.0000000000000006
  8. Albert NM. A systematic review of transitional-care strategies to reduce rehospitalization in patients with heart failure. *Heart Lung.* 2016;45(2):100-113. doi:10.1016/J.HRTLNG.2015.12.001
  9. Ba HM, Son YJ, Lee K, Kim BH. Transitional Care Interventions for Patients with Heart Failure: An Integrative Review. *Int J Environ Res Public Health.* 2020;17(8). doi:10.3390/IJERPH17082925
  10. TA M, M M, M A, et al. 2021 ESC Guidelines for the diagnosis and treatment of acute and chronic heart failure. *Eur Heart J.* 2021;42(36):3599-3726. doi:10.1093/EURHEARTJ/EHAB368

11. Bodenheimer T, Wagner EH. Improving Primary Care for Patients With Chronic Illness. *2002;288(14):1775-1779.*
12. Farré N, Vela E, Clèries M, et al. Real world heart failure epidemiology and outcome: A population-based analysis of 88,195 patients. *PLoS One.* 2017;12(2). doi:10.1371/journal.pone.0172745
13. Farré N, Vela E, Clèries M, et al. Medical resource use and expenditure in patients with chronic heart failure: a population-based analysis of 88 195 patients. *Eur J Heart Fail.* 2016;18(9):1132-1140. doi:10.1002/ejhf.549
14. Cainzos-Achirica M, Capdevila C, Vela E, et al. Individual income, mortality and healthcare resource use in patients with chronic heart failure living in a universal healthcare system: A population-based study in Catalonia, Spain. *Int J Cardiol.* 2019;277. doi:10.1016/j.ijcard.2018.10.099
15. Bilal U, Cainzos-Achirica M, Cleries M, et al. Socioeconomic status, life expectancy and mortality in a universal healthcare setting: An individual-level analysis of >6 million Catalan residents. *Prev Med (Baltim).* 2019;123(November 2018):91-94. doi:10.1016/j.ypmed.2019.03.005
16. Cainzos-Achirica M, Vela E, Cleries M, et al. Cardiovascular risk factors and disease among non-European immigrants living in Catalonia. *Heart.* 2019;105(15):1168-1174. doi:10.1136/HEARTJNL-2018-314436
17. Satish P, Vela E, Bilal U, et al. Burden of cardiovascular risk factors and disease in five Asian groups in Catalonia: a disaggregated, population-based analysis of 121 000 first-generation Asian immigrants. *Eur J Prev Cardiol.* 2022;29(6):916-924. doi:10.1093/EURJPC/ZWAB074



18. Monterde D, Vela E, Clèries M. [Adjusted morbidity groups: A new multiple morbidity measurement of use in Primary Care]. *Aten Primaria.* 2016;48(10):674-682. doi:10.1016/J.APRIM.2016.06.003
19. Vela E, Tényi Á, Cano I, et al. Population-based analysis of patients with COPD in Catalonia: a cohort study with implications for clinical management. *BMJ Open.* 2018;8(3). doi:10.1136/BMJOPEN-2017-017283
20. Chronic Condition Indicator (CCI) for ICD-9-CM. Accessed June 17, 2022. <https://www.hcup-us.ahrq.gov/toolssoftware/chronic/chronic.jsp>
